1  
2  
3  
4  
5  
6  
7  
8  
9  
10  
11  
12  
13  
14  
15  
16  
17  
18  
19  
20  
21  
22  
23

## Engineering multiple species-like genetic incompatibilities in insects

Maciej Maselko<sup>1,2†‡</sup>, Nathan Feltman<sup>1,2†</sup>, Ambuj Upadhyay<sup>1,2,3</sup>, Amanda Hayward<sup>1,2</sup>, Siba Das<sup>1,2</sup>,  
Nathan Myslicki<sup>1,2</sup>, Aidan J. Peterson<sup>3</sup>, Michael B. O'Connor<sup>3</sup>, and Michael J. Smanski<sup>1,2\*</sup>

### Affiliations:

<sup>1</sup>Department of Biochemistry, Molecular Biology, and Biophysics, <sup>2</sup>Biotechnology Institute, and  
<sup>3</sup>Department of Genetics, Cell Biology, and Development, University of Minnesota, Saint Paul, MN  
55108.

<sup>†</sup>These authors contributed equally to this work.

<sup>‡</sup> Current address: Applied Biosciences, Macquarie University, North Ryde, NSW, Australia

\*Correspondence and requests for materials should be sent to: [smanski@umn.edu](mailto:smanski@umn.edu)

24 **Abstract**

25 **Speciation constrains the flow of genetic information between populations of sexually reproducing**  
26 **organisms. Gaining control over mechanisms of speciation would enable new strategies to manage**  
27 **wild populations of disease vectors, agricultural pests, and invasive species. Additionally, such**  
28 **control would provide safe biocontainment of transgenes and gene drives. Natural speciation can**  
29 **be driven by pre-zygotic barriers that prevent fertilization or by post-zygotic genetic**  
30 **incompatibilities that render the hybrid progeny inviable or sterile. Here we demonstrate a general**  
31 **approach to create engineered genetic incompatibilities (EGIs) in the model insect *Drosophila***  
32 ***melanogaster*. Our system couples a dominant lethal transgene with a recessive resistance allele.**  
33 **EGI strains that are homozygous for both elements are fertile and fecund when they mate with**  
34 **similarly engineered strains, but incompatible with wild-type strains that lack resistant alleles. We**  
35 **show that EGI genotypes can be tuned to cause hybrid lethality at different developmental life-**  
36 **stages. Further, we demonstrate that multiple orthogonal EGI strains of *D. melanogaster* can be**  
37 **engineered to be mutually incompatible with wild-type and with each other. Our approach to create**  
38 **EGI organisms is simple, robust, and functional in multiple sexually reproducing organisms.**

39

40 **Main Text**

41 In genetics, underdominance occurs when a heterozygous genotype (Aa) is less fit than either  
42 homozygous genotype (AA and aa). In 'extreme underdominance', the heterozygote is inviable while  
43 each homozygote has equal fitness<sup>1</sup>. Extreme underdominance is an attractive and versatile tool for  
44 population control. First, it could be leveraged to create threshold-dependent, spatially-contained  
45 gene drives<sup>2</sup> capable of replacing local populations. Such gene drives may be more socially acceptable  
46 than threshold-independent gene-drives to suppress populations since their spread can be more tightly  
47 controlled. Alternatively, only males could be released for a genetic biocontrol approach that mimics  
48 sterile insect technique. Several strategies for engineering underdominance have been described,  
49 including one- or two-locus toxin-antitoxin systems<sup>3,4</sup>, chromosomal translocations<sup>5</sup>, and RNAi-based  
50 negative genetic interactions<sup>6</sup>. Despite its theoretical utility in population control, engineering  
51 extreme underdominance has been difficult<sup>1</sup>.

52 Extreme underdominance essentially constitutes a speciation event, as it prevents successful  
53 reproduction and therefore genetic exchange between two populations. In nature, prezygotic and  
54 postzygotic incompatibilities maintain species barriers. Prezygotic incompatibilities prevent  
55 fertilization from taking place. These can include geographic separation or behavioral/anatomical  
56 differences between individuals in two populations that prevent sperm and egg from meeting.  
57 Postzygotic incompatibilities occur when genetic or cellular differences between the maternal and

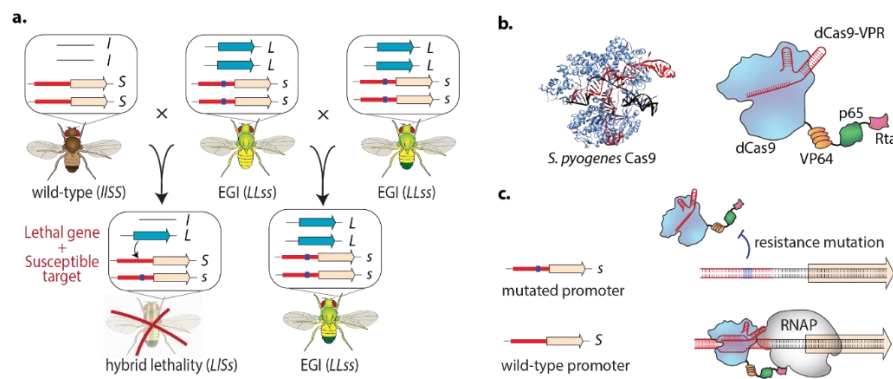

**Figure 1. Design of Engineered Genetic Incompatibility (EGI).** (a) Schematic diagram of required genotypes for EGI. *L*, dominant lethal gene; *l*, wild-type allele (null); *S*, dominant susceptible allele; *s*, recessive resistant allele. (b) X-ray crystal structure of *S. pyogenes* Cas9 (PDB ID: 6o0z, left) and diagram of dominant lethal gene product, dCas9-VPR. (c) Interaction of dCas9-VPR with resistant (top) or susceptible (bottom) alleles. RNAP, RNA polymerase.

58 paternal gametes render the offspring inviable or infertile. The Dobzhansky-Muller Incompatibility  
59 (DMI) model<sup>7,8</sup> asserts that postzygotic incompatibilities can arise via mutations that create a two-  
60 locus underdominance effect<sup>9</sup>. DMIs are considered a major driving force underlying natural  
61 speciation events. Understanding the molecular mechanisms resulting in hybrid incompatibilities  
62 between species is a central question for evolutionary biology and ecology.

63 We have recently described a versatile and effective method for engineering DMIs in the lab to  
64 direct synthetic speciation events. We name this method engineered genetic incompatibility (EGI). An  
65 EGI strain is homozygous for a lethal effector gene and the corresponding resistance allele(s). What  
66 separates EGI from described toxin/anti-toxin systems is that the lethal effector allele is  
67 haplosufficient, while the resistance allele is haploinsufficient. Any outcrossing of the EGI strain with  
68 wild-type generates inviable hybrids, as the resulting heterozygotes contain the lethal effector gene  
69 but only one copy of the haploinsufficient resistance allele (**Fig. 1a**). Unlike single locus, bi-allelic toxin-  
70 antitoxin systems<sup>3</sup>, the EGI genotype in principle incurs no fitness penalty, as 100% of the offspring  
71 between similarly engineered EGI parents remain viable. Our approach leverages sequence-  
72 programmable transcription activators (PTAs) to drive lethal over- or ectopic-expression of  
73 endogenous genes (**Fig. 1b/c**)<sup>10</sup>.

74 Here we apply EGI to engineer extreme underdominance in the model insect, *Drosophila*  
75 *melanogaster*. We show that the strength and timing of hybrid lethality can be tuned based on genetic  
76 design. Further, we show that multiple mutually-incompatible 'synthetic species' can be created for  
77 the same target organism. This has important ramifications for the design of genetic biocontrol  
78 strategies that are robust in the face of genetic resistance.

79

80 **Lethal overexpression of endogenous genes.** To drive lethal overexpression of endogenous genes, we  
81 use the dCas9-VPR, composed of a catalytically inactive Cas9 fused to three transcriptional activation

82 domains (VP64, p65, and Rta)<sup>11</sup> (**Fig. 1b**). This has been used previously to cause lethal gene activation  
83 in *D. melanogaster*<sup>12</sup>; however, we had to mitigate apparent off-target toxicity associated with strong  
84 dCas9-VPR expression in the absence of sgRNA<sup>13</sup>. Replacing the promoter driving dCas9-VPR with  
85 promoters from various developmental genes (*Pwg\**, *Pfoxo*, *Pbam*) or a truncated tubulin promoter  
86 (*Ptub*)<sup>14</sup> allowed us to constrain dCas9-VPR expression sufficiently to allow generation of homozygous  
87 fly strains. We also created viable homozygous flies expressing the evolved dxCas9-VPR transactivator  
88 from the truncated tubulin promoter<sup>15</sup>.

89 Strains homozygous for dCas9-VPR constructs were mated to strains homozygous for sgRNAs  
90 targeting several genes important for development (*hh*, *hid*, *pyr*, *upd1*, *upd2*, *upd3*, *wg*, *vn*). The  
91 parental flies were removed from mating vials after five days and the number of offspring surviving to  
92 pupal and adult life-stages were counted after 15 days (**Fig. 2, Supplementary Data File 1**). Several  
93 crosses produced no surviving adult offspring in replicate experiments. Interestingly, we observed  
94 unique hybrid incompatibility phenotypes that depended on the combination of PTA and sgRNA used  
95 to drive over- or ectopic-expression. Six crosses (red shading, **Fig. 2**) yielded no pupae, indicating  
96 embryonic or larval lethality. The strongest early lethality was seen when *Ptub:dCas9-VPR* or  
97 *Pwg\*:dCas9-VPR* drove expression of the developmental genes *pyramus*, *wingless*, and *unpaired-1*.  
98 Thirteen crosses (yellow shading, **Fig. 2**) produced a pupal-lethal phenotype. These include genotypes  
99 which are predominantly larval lethal with a small number of offspring surviving to form pupae (e.g.  
100 *Pfoxo:dCas9-VPR* with *wg-sgRNA*) as well as genotypes that give normal numbers of pupae forming,  
101 but no adults emerged (e.g. *Ptub:dCas9-VPR* with *upd3-sgRNA*). One of the crosses, *Pwg\*:dCas9-VPR*  
102 X *upd3-sgRNA* (blue shading, **Fig. 2**) produced a small number of surviving adults that were visibly  
103 deformed and died within three days of emerging from pupae. Interestingly, we observed two crosses  
104 with the *Ptub:dxCas9-VPR* parent (green shading, **Fig. 2**) that showed strong sex-ratio biasing, with  
105 predominantly (95%, *upd1*) or exclusively (100%, *upd2*) male adult survivors. The same PTA crossed  
106 with *vn* exhibits a slight sex-ratio bias of 1.7:1 males:females (Supplementary Data File). We used these  
107 data to select a sub-set of putative target genes for constructing EGI flies, focusing on *pyr*, *wg*, and *hh*  
108 moving forward.

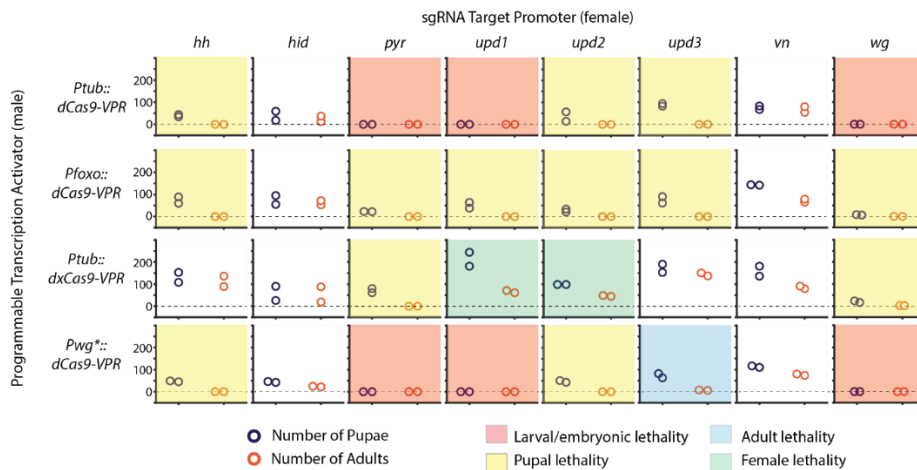

**Figure 2. Empirical determination of targets for lethal over- or ectopic-expression.** Results showing the number of progeny surviving to pupal or adult life-stages (purple, orange circles, respectively) for crosses between a paternal fly homozygous for a dCas9-VPR expression cassette (rows) and a maternal fly homozygous for sgRNA expression cassette (columns). Individual experiments are colored according to phenotype categories according to the key below.

109

110 **Constructing EGI strains.** Mutations to the sgRNA-binding sequences of target promoters are  
111 necessary to prevent lethal over- or ectopic-expression in the EGI strain. These constitute the  
112 haploinsufficient resistance alleles in the EGI design (Fig. 1a,c). To generate viable promoter  
113 mutations, flies expressing germline active Cas9 nuclease<sup>16</sup> were crossed to homozygous sgRNA-  
114 expressing strains<sup>17</sup> or were directly microinjected with sgRNA expression constructs. Offspring were  
115 crossed to balancers and F2 flies were screened for the presence of mutations via Sanger sequencing.  
116 For each target promoter, we isolated mutant flies that were viable as homozygotes and without any  
117 apparent phenotype, suggesting that the mutations are benign and do not substantially interfere with  
118 required expression from these loci (Fig. 3a, Supplementary Fig. S1). It is noteworthy that we  
119 commonly recovered mutated promoters that had independent NHEJ events at each sgRNA target  
120 site, despite their close proximity. This is contrary to the belief that targeting proximal sequences is  
121 likely to result in complete excision of the intervening sequence in the event of NHEJ<sup>18</sup>.

122 We combined each of the required components to create a full EGI genotype via one of two  
123 approaches. In each, we needed to avoid passing through intermediate genotypes that contained an  
124 active PTA and a wild-type promoter sequence, as this would be lethal. The first method involved a  
125 total of 19 crosses between flies containing Cas9, PTA, or sgRNA expression constructs that had  
126 already been characterized in Fig. 2 (Fig. 3b top, Supplementary Figs. S2-S3). The second method  
127 involved re-injecting embryos from homozygous promoter mutant strains with a single plasmid  
128 containing expression constructs for both the dCas9-VPR and the sgRNA (Fig. 3b bottom). The latter  
129 approach was more direct, requiring approximately half the number of crosses, but resulted in  
130 different chromosomal location for PTA expression compared to what was previously characterized

131 **(Supplementary Figs. S4-S6)**. Using these two methods, we produced a total of 12 unique EGI  
132 genotypes **(Supplementary Fig. S7)**. We use a short-hand naming convention that describes the target  
133 gene (*wg*, *pyr*, *hh*), the promoter driving *dCas9-VPR* (*Pwg\**, *Pfoxo*, *Ptub*, *Pbam*), and the method used  
134 in strain construction (crossing, injection): for example *pyr.Pfoxo.injection*.

135

136 **Assessing Hybrid Incompatibility.** Candidate EGI strains were crossed to wild-type (Oregon R and  
137 w1118) to assess mating compatibility. While w1118 was the ‘wild-type’ starting point for our EGI  
138 engineering efforts, male w1118 flies have a previously reported courtship phenotype<sup>19</sup>. Oregon R  
139 males lack this mating phenotype and reproduce more efficiently. We performed intra-specific  
140 matings (male and female from the same EGI genotype) and EGI × wild-type matings by combining  
141 three virgin females of one genotype with two males of another genotype. The number of pupae and  
142 adult progeny were counted after 15 days just as for the hybrid lethality screen described above. EGI  
143 strains that drove over- or ectopic-expression of *wingless* or *pyramus* both showed full incompatibility,  
144 with no hybrids surviving to adulthood **(Fig. 3c)**. These represent engineered extreme  
145 underdominance. The EGI lines were healthy and fecund, with EGI × EGI crosses yielding numbers of  
146 offspring on par with wild-type × wild-type crosses. A third EGI strain targeting the *hedgehog*  
147 promoter showed a marked underdominant phenotype, but not as strong as the extremely  
148 underdominant *wg*- or *pyr*-EGI strains. Approximately 10-13% of hybrid offspring from *hh*-EGI crosses  
149 survived to adulthood. Of these surviving offspring, the females were all sterile, but the males were  
150 not, supporting a role of proper hedgehog expression in oogenesis<sup>20,21</sup>. That the initial *hh*-EGI strain  
151 was not as robust as *wg*- or *pyr*-EGI strains is not surprising. Activation of *hedgehog* produced a later-  
152 acting lethal phenotype compared to activation of *pyramus* and *wingless* in the PTA × sgRNA crosses  
153 (yielding pupal lethality instead of larval lethality). We believe that the weaker phenotype for *hh*-  
154 targeting guides in the EGI × wild-type hybrids (i.e. **Fig. 3**) versus the PTA × sgRNA crosses (i.e. **Fig. 2**)  
155 is the result of having only one sensitive (wild-type) promoter from which to drive lethal expression in  
156 the EGI × wild-type hybrids.

157 In order to confirm the mechanism of hybrid lethality, we performed immunohistochemistry on  
158 hybrid larva. We stained for target gene overexpression (Wingless) or activation of known  
159 downstream components in the relevant signalling pathways (p-ERK1/2 and Patched (Ptc) for EGI  
160 targets *pyr* and *hh*, respectively). For our *wg*-targeting EGI line we observed overexpression, but no  
161 ectopic expression, in the wing imaginal disc as expected from our *Pwg\*::dCas9-VPR* expression  
162 design, in which the PTA is itself driven by the mutated *wg* promoter **(Fig. 3d, top panel)**. Interestingly,  
163 we did observe unique staining patterns in the brain, but are not sure if this is due to ectopic  
164 expression or just accumulation of the overproduced ligand **(Supplementary Fig. S8)**. When we drive

165 expression of *pyr* or *hh* with a *foxo* or short *tubulin* promoter, respectively, we observe clear evidence  
 166 of ectopic expression in hybrid larva (**Fig. 3d, Supplementary Fig. S8**). For the *pyr*-targeting EGI line,  
 167 we observed ectopic activation of pERK1/2 in clusters of cells throughout the wing imaginal disc,  
 168 whereas pERK1/2 is normally activated in a speckled like pattern. For the *hh*-targeting EGI line, we  
 169 observe Patched ectopic production only in the anterior compartment, which phenocopies previous  
 170 experiments of *hh* overexpression in imaginal discs<sup>22</sup>.

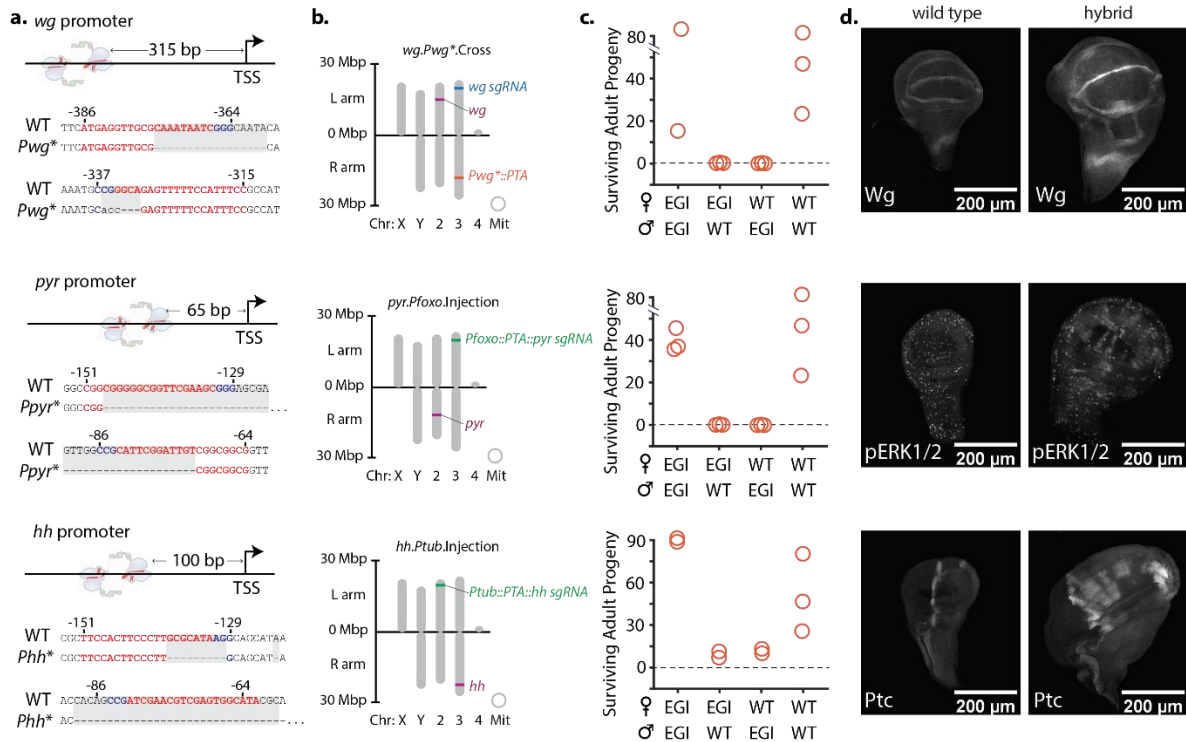

**Figure 3. Genotype and hybrid incompatibility of select EGI strains.** (a) Proximity of sgRNA binding sites to transcription start site (TSS) for EGI strains. Sequences of both sgRNA binding sites are shown below promoter illustration, with protospacers in red and protospacer adjacent motifs in blue. Sequences of the mutated promoters at the sgRNA binding loci are shown below with differences highlighted in grey shadow. (b) Chromosomal locations of genome alterations. (c) Hybrid incompatibility data showing number of progeny surviving to adulthood. Genotype of parental strains for each cross are given on the x-axis. (d) Immunohistochemical staining of wild-type (left) or hybrid (right) larva showing over- or ectopic-expression of targeted signalling pathways. Antibody binding targets are labelled in the bottom left corner of each image. For each panel, the *wg*-, *pyr*-, and *hh*-targeting EGI genotypes are shown from top to bottom.

171

172

173 **Mutual incompatibility between EGI strains with distinct genotypes.** We predicted that our method

174 of generating species-like barriers to sexual reproduction would allow us to engineer not just one, but

175 many EGI genotypes that are all incompatible with wild-type and with each other. To test this, we

176 performed a large all-by-all cross-compatibility experiment that included 12 EGI and 2 wild-type

177 genotypes. Each cross was performed bi-directionally (female of strain A to male of strain B and vice

178 versa). The orthogonality plot (**Fig. 4**) shows number of surviving adults from each cross. Crosses that

179 are expected to produce viable offspring are present on the diagonal, with multiple “compatibility

180 groups” defined by target-promoter mutations. Nine EGI strains were 100% incompatible with one or  
181 both wild-type lines. These include strains designed towards each of the developmental morphogen  
182 targets (*hh*, *pyr*, and *wg*). The high degree of symmetry across the diagonal shows that EGI produces  
183 bi-directional incompatibility, with the number of surviving offspring being similar if the EGI constructs  
184 were inherited maternally or paternally. While this is true when assessing the number of surviving  
185 adult progeny, we observed differences in timing of lethality for maternally versus paternally inherited  
186 EGI constructs (**Supplementary Data File 1, Supplementary Video File 1**).

187 Nuanced differences in genetic design are important for the performance of EGI strains. For  
188 example, *wg.Pwg\*.cross* and *wg.Pwg\*.injection* have the same genetic components and are expected  
189 to work via identical mechanisms. The only difference is the chromosomal location of the PTA  
190 components. Despite their similarity, the former shows 100% incompatibility with wild-type, while the  
191 latter shows normal numbers of surviving offspring. This difference in performance is likely due to  
192 variable expression levels of the PTA construct, although this was not directly tested. Overall, these  
193 results show that we can engineer multiple EGI strains for a target organism. This has important  
194 implications in overcoming resistance to genetic population control, which is discussed in detail below.

195

## 196 **Discussion**

197 Here we demonstrate the ability to rationally engineer species-like barriers to sexual reproduction  
198 in a multicellular organism. We employed the EGI approach that was recently described in yeast<sup>10</sup>. Our  
199 successful implementation in flies confirms that this is a broadly applicable strategy for engineering  
200 reproductive barriers. Engineered speciation has been previously described in *D. melanogaster* by  
201 Moreno, wherein a non-essential transcription factor, *glass*, was knocked out and *glass*-dependent  
202 lethal gene construct was introduced<sup>23</sup>. This approach also uses a similar topology to EGI; however,  
203 the resulting flies were blind in the absence of *glass* and this approach could not be scaled to make  
204 multiple incompatible strains. Our use of PTAs to drive lethal over- or ectopic-expression allows us to  
205 generate multiple EGI strains with no noticeable phenotypes aside from their hybrid incompatibility.  
206 Using a similar approach, Windbichler et al. developed PTAs capable of driving lethal overexpression  
207 of developmental morphogens in *D. melanogaster*, but were unable to generate complete EGI strains  
208 due to target selection and transgene toxicity<sup>14</sup>. We found that the ability create viable EGI lines  
209 requires empirical tweaking of genetic designs to ensure the required components are expressed at  
210 sufficiently high levels to drive lethal expression in hybrid offspring, but not so high to cause toxicity  
211 in the EGI organisms.

212



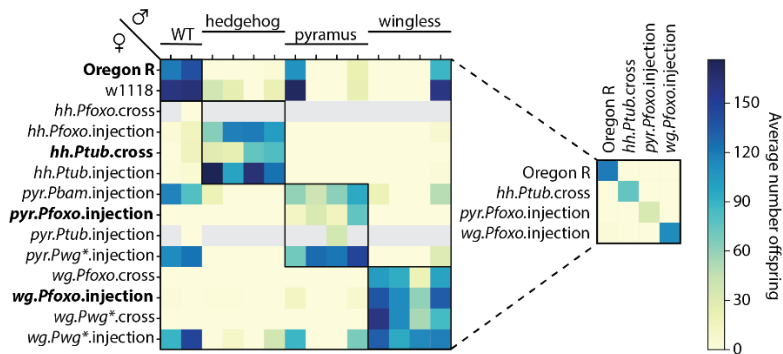

**Figure 4. Engineering multiple orthogonal EGI strains.** Mating compatibility between wild-type and 12 EGI genotypes, reported as the number of adult offspring 15 days after mating. Female (maternal) genotype is listed on the left axis with the naming convention [target.PTApromoter.construction-method], and male (paternal) genotypes are presented in the same order along the top axis. Predicted compatible strains are indicated with black-outline boxes across the diagonal. Grey boxes indicate crosses that were not measured for lack of virgin females for *hh.Pfxo.injection* and *pyr.Ptub.injection* strains. Smaller grid at right highlights four mutually-compatible strains. Unless otherwise noted in **Supplementary Data File 1**, values represent mean of three independent replicates.

213

214 The ability to rationally design reproductive barriers opens up diverse opportunities for pest  
 215 management and biocontrol of invasive species as well as genetic containment of novel proprietary  
 216 genetically modified organisms<sup>24</sup>. Underdominance-based gene drives are threshold-dependent and  
 217 allow for localized population replacement<sup>25</sup>. Several strategies for engineered underdominance  
 218 exist<sup>4-6</sup>, but the EGI system is the first to produce 100% lethality of F1 heterozygotes. Compared to  
 219 homing endonuclease gene drives, underdominance drives are more easily reversible and less likely  
 220 to spread beyond the local target population<sup>26</sup>. Extreme underdominance gene drives are unique in  
 221 their ability to spread genes/traits through a population that are unlinked to the drive allele. Since no  
 222 hybrids between the biocontrol agent and wild-type organisms are viable, there is no opportunity for  
 223 recombination events to break the linkage between the drive allele and other genes in the genome.  
 224 Thus, EGI could be used to replace multi-locus traits in a target population.

225 Alternatively, EGI could be used as an alternative to Sterile Insect Technique<sup>27</sup> by releasing only one  
 226 sex. For example, released males would compete with wild males to mate with wild females. Any egg  
 227 fertilized by an EGI male would fail to develop to adulthood. In applications such as this, our ability to  
 228 tune the life-stage of hybrid lethality could have dramatic impact on the success of a biocontrol  
 229 program. Late-acting pupal lethality would still allow for hybrid larva to compete for resources with  
 230 wild-type larva. This is preferred for insects with ‘overcompensating density-dependence’ at larval  
 231 stages<sup>28-30</sup>, where decreasing larval numbers increases the larval survival probability to the point  
 232 where the total population actually grows instead of shrinks. On the contrary, embryonic-lethality  
 233 could be preferred for agricultural pests whose larva cause extensive crop damage<sup>31</sup>.

234 There are three primary mechanisms by which the incompatibility provided by EGI could ‘break’:  
235 (i) transgene silencing of the dCas9-based PTA, (ii) early promoter conversion of the target locus in  
236 hybrid organisms, and (iii) underlying sequence diversity at target loci in wild populations that prevent  
237 PTA recognition. We have previously published an engineering solution to (i) that involves creating a  
238 positive selection for the PTA using endogenous essential genes<sup>10</sup>. Promoter conversion is unlikely to  
239 effect the success of biocontrol programs due to an inherent fitness defect in such escape mutants<sup>32</sup>.  
240 To address the underlying sequence diversity at target loci, population genetics studies should  
241 precede strain engineering to identify highly conserved targetable regions, which we have found to  
242 be present in populations of interest [Smanski, unpublished]. However, all of these resistance  
243 mechanisms can be mitigated using mutually incompatible EGI strains (*e.g.* **Fig. 4**). With just two  
244 orthogonal EGI strains (‘A’ and ‘B’), an iterative release of A-B-A-B-A-B... for biocontrol is expected to  
245 result in negatively correlated cross-resistance<sup>33</sup> (**Supplementary Fig. S9**). Any surviving hybrids from  
246 mating events between EGI-A and wild-type would automatically inherit a susceptibility to EGI-B  
247 (because EGI-A and EGI-B are mutually incompatible). Thus these surviving ‘escapees’ would be  
248 sensitive to the next release of EGI-B, and this renewed sensitization would continue with each  
249 sequential release.

250 In summary, we demonstrate the ability to engineer species-like genetic incompatibilities in a  
251 multicellular organism. Our approach uses genetic tools that have been proven effective in many  
252 organisms, and our design is applicable to any sexually-reproducing species. We show that the EGI  
253 approach is robust to specific design implementations, with extreme underdominance possible with  
254 at least three distinct developmental morphogen targets. Further, we show that multiple ‘synthetic  
255 species’ can be engineered from a given target organism.

256

## 257 **Methods**

258 **Plasmids.** Plasmids expressing dCas9-VPR were constructed by Isothermal assembly<sup>34</sup> combining NotI  
259 linearized pMBO2744 attP vector backbone with dCas9-VPR PCR amplified from pAct:dCas9-VPR  
260 (Addgene #78898)<sup>35</sup> and SV40 terminator for pH-Stinger (BDSC, #1018) to generate pMM7-6-1.  
261 Isothermal assembly was used to clone 5’UTR and ~1.5kb of promoter sequence into NotI linearized  
262 pMM7-6-1 (pMM7-6-2: Foxo promoter. pMM7-6-3: Tubulin promoter. pMM7-6-4: wingless  
263 promoter. pMM7-6-5: Bam promoter). Plasmids expressing dxCas9-VPR were constructed by  
264 introducing mutations into the dCas9 region predicted to improve activity<sup>36</sup> to generate pMM7-9-3  
265 which also has a NotI linearization site used for cloning promoter and 5’UTR sequences.

266 Plasmids expressing sgRNAs were generated by cloning annealed oligos into p{CFD4-3xP3::DsRed}  
267 (Addgene #86864).

268 Plasmids expressing both sgRNAs and dCas9-VPR were constructed by Isothermal assembly  
269 combining KpnI linearized dCas9-VPR plasmids (pMM7-6-2 through pMM7-6-5) with sgRNAs amplified  
270 from genomic DNA from *Drosophila melanogaster* stocks that are available from BDSC (pyr sgRNA:  
271 67537. Hh sgRNA: 67560. Upd1: 67555. Wg: 67545). See **Supplementary Table S2** for plasmid  
272 descriptions.

273 **Drosophila stocks.** Experimental crosses were performed at 25°C and 12 hour days. Existing Cas9  
274 and sgRNA strains were obtained from the Bloomington Drosophila Stock Center. All transgenic flies  
275 were generated via  $\Phi$ C31 mediated integration targeted to attP landing sites. Embryo microinjections  
276 were performed by BestGene Inc (Chino Hills, Ca). See **Supplementary Table S1** for descriptions of fly  
277 strains.

278 **Drosophila rearing conditions.** All drosophila strains were grown on Bloomington Formulation  
279 Nutri-Fly media containing 4% v/v 1M propionic acid (pH 4.3). Additional dry yeast crumbs were added  
280 to vials during EGI strain generation matings. No additional yeast was used in any mating compatibility  
281 tests. The flies were housed at 25° C with 12hr day/night cycles. Drosophila strains used in the all-by-  
282 all cross were moved to 18° C overnight to aid in virgin female collection the following day.

283 **Mating compatibility tests.** Genetic compatibility was assayed between parental stock  
284 homozygous for the PTA or sgRNA expression cassette (i.e. PTA-sgRNA testing) as well as between  
285 final EGI genotypes and wild-type (i.e. EGI testing). Test crosses were performed by crossing sexually-  
286 mature adult males to sexually-mature virgin females homozygous for their respective genotype at a  
287 ratio of 3:3 (PTA-sgRNA testing) or 2:3 (EGI testing). The adults were removed from the vials after 5  
288 days and the offspring were counted after 15 days. Filled and empty pupal cases were counted  
289 towards the pupae total and adult males and females were counted towards the adult count.  
290 Independent mating compatibility tests were performed in duplicate (PTA-sgRNA testing) or triplicate  
291 (EGI testing). In all-by-all EGI compatibility test (**Fig. 4**), the data for the *pyr.Pfoxo*.injection self-cross  
292 was performed independently from the other crosses in that dataset.

293 **Immunohistochemistry.** Late 3rd instar larvae were dissected in cold PBS, and fixed with 4%  
294 formaldehyde (Electron Microscopy Science, RT-15714) overnight at 4°C. Tissues were washed and  
295 permeabilized with PBS-TritonX-100 (0.1%) before staining with appropriate antibodies. Tissues for  
296 fluorescence microscopy were mounted with 80% Glycerol in PBS (0.1% TritonX-100). Images were  
297 captured using the Zeiss LSM710. Confocal Z-stacks were processed in FIJI (ImageJ).

298 **Antibodies and staining reagents.** Drosophila-Patched, apa1 (Developmental Studies Hybridoma  
299 Bank (DSHB)) (1:50); Drosophila-Wingless, 4D4 (DSHB) (1:50); Drosophila-Armadillo, N2-7A1 (DSHB)  
300 (1:50); Phospho-MAPK (ERK1/2), #4370 (Cell Signaling Technologies) (1:100). AlexaFluor 568 and 647

301 (Invitrogen) conjugated secondary antibodies were used as necessary at (1:500) dilution. Tissues were  
302 counterstained with DAPI (Millipore Sigma, #D9542) (1 µg/ml).

303

### 304 **Acknowledgements**

305 MJS is supported in part by the Defense Advanced Research Projects Agency (grant number  
306 D17AP00028). The views, opinions, and/or findings contained in this article are those of the  
307 authors and should not be interpreted as representing the official views or policies, either  
308 expressed or implied, of the Defense Advanced Research Projects Agency or the Department  
309 of Defense.

### 310 **Author contributions**

311 MM and MJS conceived this study. MM, NF, AH, AU, AJP, MBO, and MJS designed  
312 experiments. MM, NF, AU, AH, SD, and NM performed experiments. MM, NF, and MJS wrote  
313 the manuscript.

### 314 **Competing interests**

315 MM, SD, and MJS are cofounders of NovoClade. This work has been submitted for provisional  
316 patent approval.

317

### 318 **References**

- 319 (1) Davis, S.; Bax, N.; Grewe, P. (2001) Engineered Underdominance Allows Efficient and  
320 Economical Introgression of Traits into Pest Populations. *J. Theor. Biol.* 212 (1), 83–98.  
321 <https://doi.org/10.1006/jtbi.2001.2357>.
- 322 (2) Leftwich, P. T.; Edgington, M. P.; Harvey-Samuel, T.; Carabajal Paladino, L. Z.; Norman, V. C.;  
323 Alphey, L. Recent Advances in Threshold-Dependent Gene Drives for Mosquitoes.  
324 *Biochemical Society Transactions*. 2018. <https://doi.org/10.1042/BST20180076>.
- 325 (3) Sinkins, S. P.; Gould, F. (2006) Gene Drive Systems for Insect Disease Vectors. *Nat. Rev. Genet.*  
326 7 (6), 427–435. <https://doi.org/10.1038/nrg1870>.
- 327 (4) Akbari, O. S.; Matzen, K. D.; Marshall, J. M.; Huang, H.; Ward, C. M.; Hay, B. A. (2013) A  
328 Synthetic Gene Drive System for Local, Reversible Modification and Suppression of Insect  
329 Populations. *Curr. Biol.* 23 (8), 671–677. <https://doi.org/10.1016/j.cub.2013.02.059>.
- 330 (5) Buchman, A. B.; Ivy, T.; Marshall, J. M.; Akbari, O. S.; Hay, B. A. (2018) Engineered Reciprocal  
331 Chromosome Translocations Drive High Threshold, Reversible Population Replacement in  
332 *Drosophila*. *ACS Synth. Biol.* 7 (5), 1359–1370. <https://doi.org/10.1021/acssynbio.7b00451>.
- 333 (6) Guy Reeves, R.; Bryk, J.; Altrock, P. M.; Denton, J. A.; Reed, F. A. (2014) First Steps towards  
334 Underdominant Genetic Transformation of Insect Populations. *PLoS One*.

- 335 <https://doi.org/10.1371/journal.pone.0097557>.
- 336 (7) Dobzhansky, T. (1936) Studies on Hybrid Sterility II: Localization of Sterility Factors in  
337 *Drosophila Pseudoobscura* Hybrids. *Genetics* 21, 113–135.
- 338 (8) Muller, H. J. Isolating Mechanisms, Evolution and Temperature. *Biol. Symp.* 1942, p 71–125  
339 ST–Isolating mechanisms, evolution and t.
- 340 (9) Orr, H. A.; Turelli, M. (2001) The Evolution of Postzygotic Isolation: Accumulating Dobzhansky-  
341 Muller Incompatibilities. *Evolution (N. Y.)* 55 (6), 1085–1094.
- 342 (10) Maselko, M.; Heinsch, S. C.; Chacón, J. M.; Harcombe, W. R.; Smanski, M. J. (2017)  
343 Engineering Species-like Barriers to Sexual Reproduction. *Nat. Commun.* 8 (1).  
344 <https://doi.org/10.1038/s41467-017-01007-3>.
- 345 (11) Chavez, A.; Scheiman, J.; Vora, S.; Pruitt, B. W.; Tuttle, M.; P R Iyer, E.; Lin, S.; Kiani, S.;  
346 Guzman, C. D.; Wiegand, D. J.; et al. (2015) Highly Efficient Cas9-Mediated Transcriptional  
347 Programming. *Nat. Methods*. <https://doi.org/10.1038/nmeth.3312>.
- 348 (12) Lin, S.; Ewen-Campen, B.; Ni, X.; Housden, B. E.; Perrimon, N. (2015) In Vivo Transcriptional  
349 Activation Using CRISPR/Cas9 in *Drosophila*. *Genetics* 201 (2), 433–442.  
350 <https://doi.org/10.1534/genetics.115.181065>.
- 351 (13) Ewen-Campen, B.; Yang-Zhou, D.; Fernandes, V. R.; González, D. P.; Liu, L.-P.; Tao, R.; Ren, X.;  
352 Sun, J.; Hu, Y.; Zirin, J.; et al. (2017) Optimized Strategy for in Vivo Cas9-Activation in  
353 *Drosophila*. *Proc. Natl. Acad. Sci.* 201707635. <https://doi.org/10.1073/pnas.1707635114>.
- 354 (14) Waters, A. J.; Capriotti, P.; Gaboriau, D.; Papathanos, P. A.; Windbichler, N.; Alexander, S.;  
355 Building, F.; Kensington, S. (2018) Rationally-Engineered Reproductive Barriers Using CRISPR  
356 & CRISPRa: An Evaluation of the Synthetic Species Concept in *Drosophila Melanogaster*. *Sci.*  
357 *Transl. Med.* <https://doi.org/10.1101/259010>.
- 358 (15) Hu, J. H.; Miller, S. M.; Geurts, M. H.; Tang, W.; Chen, L.; Sun, N.; Zeina, C. M.; Gao, X.; Rees,  
359 H. A.; Lin, Z.; et al. (2018) Evolved Cas9 Variants with Broad PAM Compatibility and High DNA  
360 Specificity. *Nature*. <https://doi.org/10.1038/nature26155>.
- 361 (16) Gratz, S. J.; Cummings, A. M.; Nguyen, J. N.; Hamm, D. C.; Donohue, L. K.; Harrison, M. M.;  
362 Wildonger, J.; O’connor-Giles, K. M. Genome Engineering of *Drosophila* with the CRISPR RNA-  
363 Guided Cas9 Nuclease. *Genetics*. August 2013, pp 1029–1035.  
364 <https://doi.org/10.1534/genetics.113.152710>.
- 365 (17) Ewen-Campen, B.; Yang-Zhou, D.; Fernandes, V. R.; González, D. P.; Liu, L. P.; Tao, R.; Ren, X.;  
366 Sun, J.; Hu, Y.; Zirin, J.; et al. (2017) Optimized Strategy for in Vivo Cas9-Activation in  
367 *Drosophila*. *Proc. Natl. Acad. Sci. U. S. A.* <https://doi.org/10.1073/pnas.1707635114>.
- 368 (18) Champer, J.; Liu, J.; Oh, S. Y.; Reeves, R.; Luthra, A.; Oakes, N.; Clark, A. G.; Messer, P. W.

- 369 (2018) Reducing Resistance Allele Formation in CRISPR Gene Drive. *Proc. Natl. Acad. Sci. U. S.*  
370 A. <https://doi.org/10.1073/pnas.1720354115>.
- 371 (19) Krstic, D.; Boll, W.; Noll, M. (2013) Influence of the White Locus on the Courtship Behavior of  
372 *Drosophila* Males. *PLoS One*. <https://doi.org/10.1371/journal.pone.0077904>.
- 373 (20) Forbes, A. J.; Lin, H.; Ingham, P. W.; Spradling, A. C. (1996) Hedgehog Is Required for the  
374 Proliferation and Specification of Ovarian Somatic Cells Prior to Egg Chamber Formation in  
375 *Drosophila*. *Development*.
- 376 (21) Vied, C.; Horabin, J. I. (2001) The Sex Determination Master Switch, Sex-Lethal, Responds to  
377 Hedgehog Signaling in the *Drosophila* Germline. *Development*.
- 378 (22) Alexandre, C.; Jacinto, A.; Ingham, P. W. (1996) Transcriptional Activation of Hedgehog Target  
379 Genes in *Drosophila* Is Mediated Directly by the Cubitus Interruptus Protein, a Member of the  
380 GLI Family of Zinc Finger DNA-Binding Proteins. *Genes Dev*.  
381 <https://doi.org/10.1101/gad.10.16.2003>.
- 382 (23) Moreno, E. (2012) Design and Construction of “Synthetic Species.” *PLoS One* 7 (7), e39054.  
383 <https://doi.org/10.1371/journal.pone.0039054>.
- 384 (24) Clark, M.; Maselko, M. (2020) Transgene Biocontainment Strategies for Molecular Farming.  
385 *Front. Plant Sci.* 11 (March), 1–11. <https://doi.org/10.3389/fpls.2020.00210>.
- 386 (25) Magori, K.; Gould, F. (2006) Genetically Engineered Underdominance for Manipulation of  
387 Pest Populations: A Deterministic Model. *2620* (April), 2613–2620.  
388 <https://doi.org/10.1534/genetics.105.051789>.
- 389 (26) Champer, J.; Buchman, A.; Akbari, O. S. Cheating Evolution: Engineering Gene Drives to  
390 Manipulate the Fate of Wild Populations. *Nature Reviews Genetics*. 2016, pp 146–159.  
391 <https://doi.org/10.1038/nrg.2015.34>.
- 392 (27) Dyck, V. A.; Hendrichs, J.; Robinson, A. S. *Sterile Insect Technique: Principles and Practice in*  
393 *Area-Wide Integrated Pest Management*. <https://doi.org/10.5860/CHOICE.43-5894>.
- 394 (28) Alphey, N.; Bonsall, M. B. (2014) Interplay of Population Genetics and Dynamics in the  
395 Genetic Control of Mosquitoes. *J. R. Soc. Interface*. <https://doi.org/10.1098/rsif.2013.1071>.
- 396 (29) Legros, M.; Lloyd, A. L.; Huang, Y.; Gould, F. (2009) Density-Dependent Intraspecific  
397 Competition in the Larval Stage of *Aedes Aegypti* (Diptera: Culicidae): Revisiting the Current  
398 Paradigm. *J. Med. Entomol.* 46 (3), 409–419. <https://doi.org/10.1603/033.046.0301>.
- 399 (30) Walsh, R. K.; Facchinelli, L.; Ramsey, J. M.; Bond, J. G.; Gould, F. (2011) Assessing the Impact  
400 of Density Dependence in Field Populations of *Aedes Aegypti*. *J. Vector Ecol.*  
401 <https://doi.org/10.1111/j.1948-7134.2011.00170.x>.
- 402 (31) Asplen, M. K.; Anfora, G.; Biondi, A.; Choi, D. S.; Chu, D.; Daane, K. M.; Gibert, P.; Gutierrez, A.

- 403 P.; Hoelmer, K. A.; Hutchison, W. D.; et al. (2015) Invasion Biology of Spotted Wing Drosophila  
404 (*Drosophila Suzukii*): A Global Perspective and Future Priorities. *J. Pest Sci. (2004)*. 88 (3),  
405 469–494. <https://doi.org/10.1007/s10340-015-0681-z>.
- 406 (32) Maselko, M.; Heinsch, S.; Das, S.; Smanski, M. J. (2018) Genetic Incompatibility Combined  
407 with Female-Lethality Is Effective and Robust in Simulations of *Aedes Aegypti* Population  
408 Control. *Bioarxiv* <http://dx.doi.org/10.1101/316406>.
- 409 (33) Chapman, R. B.; Penman, D. R. Negatively Correlated Cross-Resistance to a Synthetic  
410 Pyrethroid in Organo-Phosphorus-Resistant *Tetranychus Urticae* [11]. *Nature*. 1979.  
411 <https://doi.org/10.1038/281298a0>.
- 412 (34) Gibson, D. G.; Young, L.; Chuang, R.-Y.; Venter, J. C.; Hutchison, C. A.; Smith, H. O. (2009)  
413 Enzymatic Assembly of DNA Molecules up to Several Hundred Kilobases. *Nat. Methods* 6,  
414 343–345. <https://doi.org/10.1038/nmeth.1318>.
- 415 (35) Chavez, A.; Tuttle, M.; Pruitt, B. W.; Ewen-campen, B.; Chari, R.; Ter-ovanesyan, D.; Haque, S.  
416 J.; Cecchi, R. J.; Kowal, E. J. K.; Buchthal, J.; et al. (2016) Comparison of Cas9 Activators in  
417 Multiple Species. *Nat. Methods* No. May, 1–7. <https://doi.org/10.1038/nmeth.3871>.
- 418 (36) Richardson, C. D.; Ray, G. J.; DeWitt, M. A.; Curie, G. L.; Corn, J. E. (2016) Enhancing  
419 Homology-Directed Genome Editing by Catalytically Active and Inactive CRISPR-Cas9 Using  
420 Asymmetric Donor DNA. *Nat. Biotechnol.* <https://doi.org/10.1038/nbt.3481>.
- 421 (37) Lindsley, D. L.; Grell, E. H.; Bridges, C. B. (Calvin B. *Genetic Variations of Drosophila*  
422 *Melanogaster*.
- 423 (38) Ryder, E.; Hartl, D. L.; Wu, C. -tin. (2004) The DrosDel Collection: A Set of P-Element Insertions  
424 for Generating Custom Chromosomal Aberrations in *Drosophila Melanogaster*. *Genetics* 167  
425 (2), 797–813. <https://doi.org/10.1534/genetics.104.026658>.
- 426 (39) Venken, K. J. T.; He, Y.; Hoskins, R. A.; Bellen, H. J. (2006) P[Acman]: A BAC Transgenic  
427 Platform for Targeted Insertion of Large DNA Fragments in *D. Melanogaster*. *Science* 314  
428 (5806), 1747–1751. <https://doi.org/10.1126/science.1134426>.
- 429 (40) Port, F.; Chen, H. M.; Lee, T.; Bullock, S. L. (2014) Optimized CRISPR/Cas Tools for Efficient  
430 Germline and Somatic Genome Engineering in *Drosophila*. *Proc. Natl. Acad. Sci. U. S. A.* 111  
431 (29), E2967-76. <https://doi.org/10.1073/pnas.1405500111>.
- 432 (41) Addgene: p{CFD4-3xP3::DsRed}.
- 433 (42) Lin, S.; Ewen-Campen, B.; Ni, X.; Housden, B. E.; Perrimon, N. (2015) In Vivo Transcriptional  
434 Activation Using CRISPR/Cas9 in *Drosophila*. *Genetics* 201 (2), 433–442.  
435 <https://doi.org/10.1534/genetics.115.181065>.
- 436





438 **Supplementary Information for:**

439

440

441

## 442 **Engineering multiple species-like genetic incompatibilities in insects**

443

444

445 Maciej Maselko<sup>1,2†‡</sup>, Nathan Feltman<sup>1,2†</sup>, Ambuj Upadhyay<sup>1,2,3</sup>, Amanda Hayward<sup>1,2</sup>, Siba Das<sup>1,2</sup>,

446 Nathan Myslicki<sup>1,2</sup>, Aidan J. Peterson<sup>3</sup>, Michael B. O'Connor<sup>3</sup>, and Michael J. Smanski<sup>1,2\*</sup>

447

448

### 449 **Affiliations:**

450 <sup>1</sup>Department of Biochemistry, Molecular Biology, and Biophysics, <sup>2</sup>Biotechnology Institute, and

451 <sup>3</sup>Department of Genetics, Cell Biology, and Development, University of Minnesota, Saint Paul, MN

452 55108.

453

454 <sup>†</sup>These authors contributed equally to this work.

455 <sup>‡</sup> Current address: Applied Biosciences, Macquarie University, North Ryde, NSW, Australia

456 <sup>\*</sup>Correspondence and requests for materials should be sent to: [smanski@umn.edu](mailto:smanski@umn.edu)

457

458

459

### 460 **This PDF file includes:**

461

462 Supplementary Figs. S1 to S9

463 Supplementary Tables S1 to S4

464 Legend for Supplementary Data File 1

465 Legend for Supplementary Video File 1

466 References

467

### 468 **Other Supplementary Materials for this manuscript include the following:**

469

470 Supplementary Data File 1

471 Supplementary Video File 1

472

473 **Supplementary Figure S1: Promoter mutation characterization.**

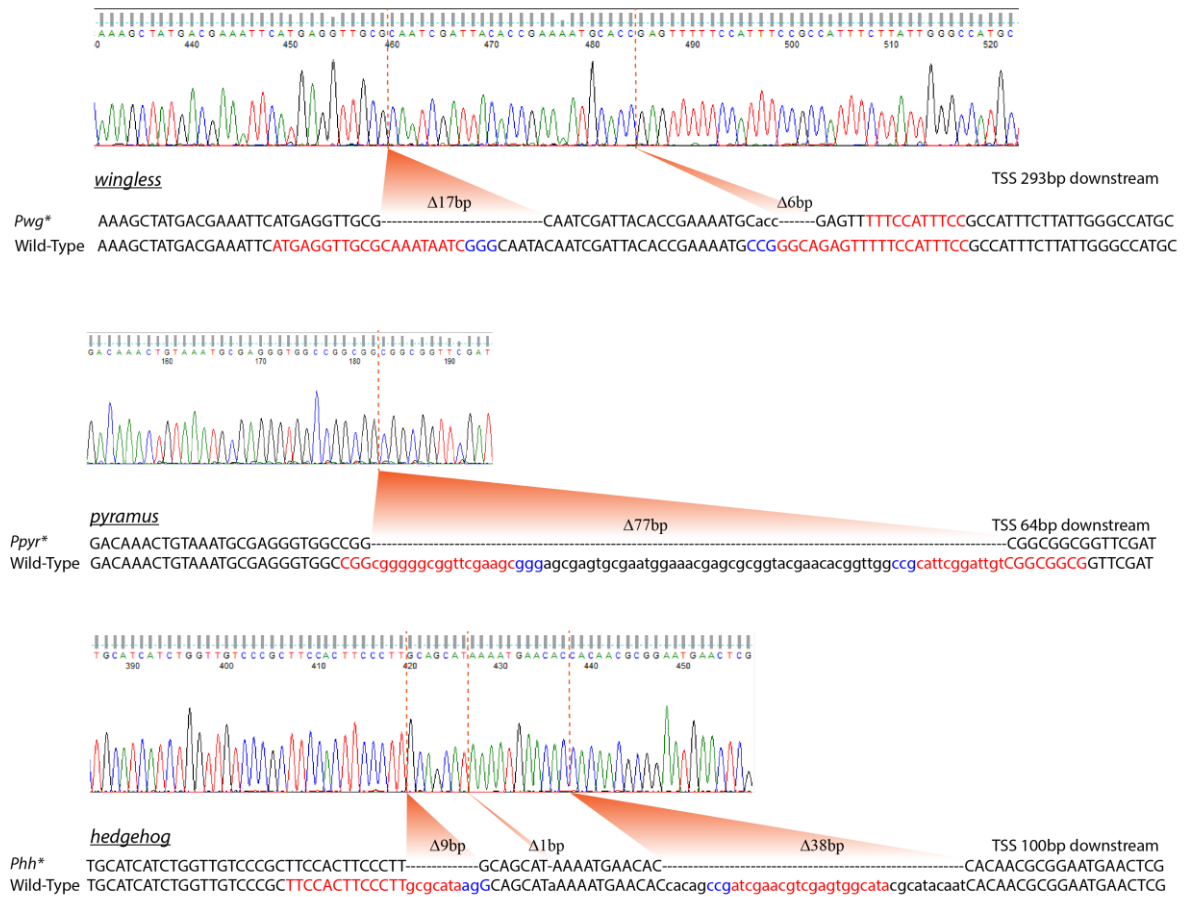

474

475 **Supplementary Figure 1. Promoter Mutations.** Promoter mutant sequencing traces and alignments to wild-  
 476 type promoters. Targeted protospacers indicated in red and PAMs indicated in blue.

477

478



482 **Supplementary Figure S3: Crossing strategy to produce *wg*-EGI flies.**

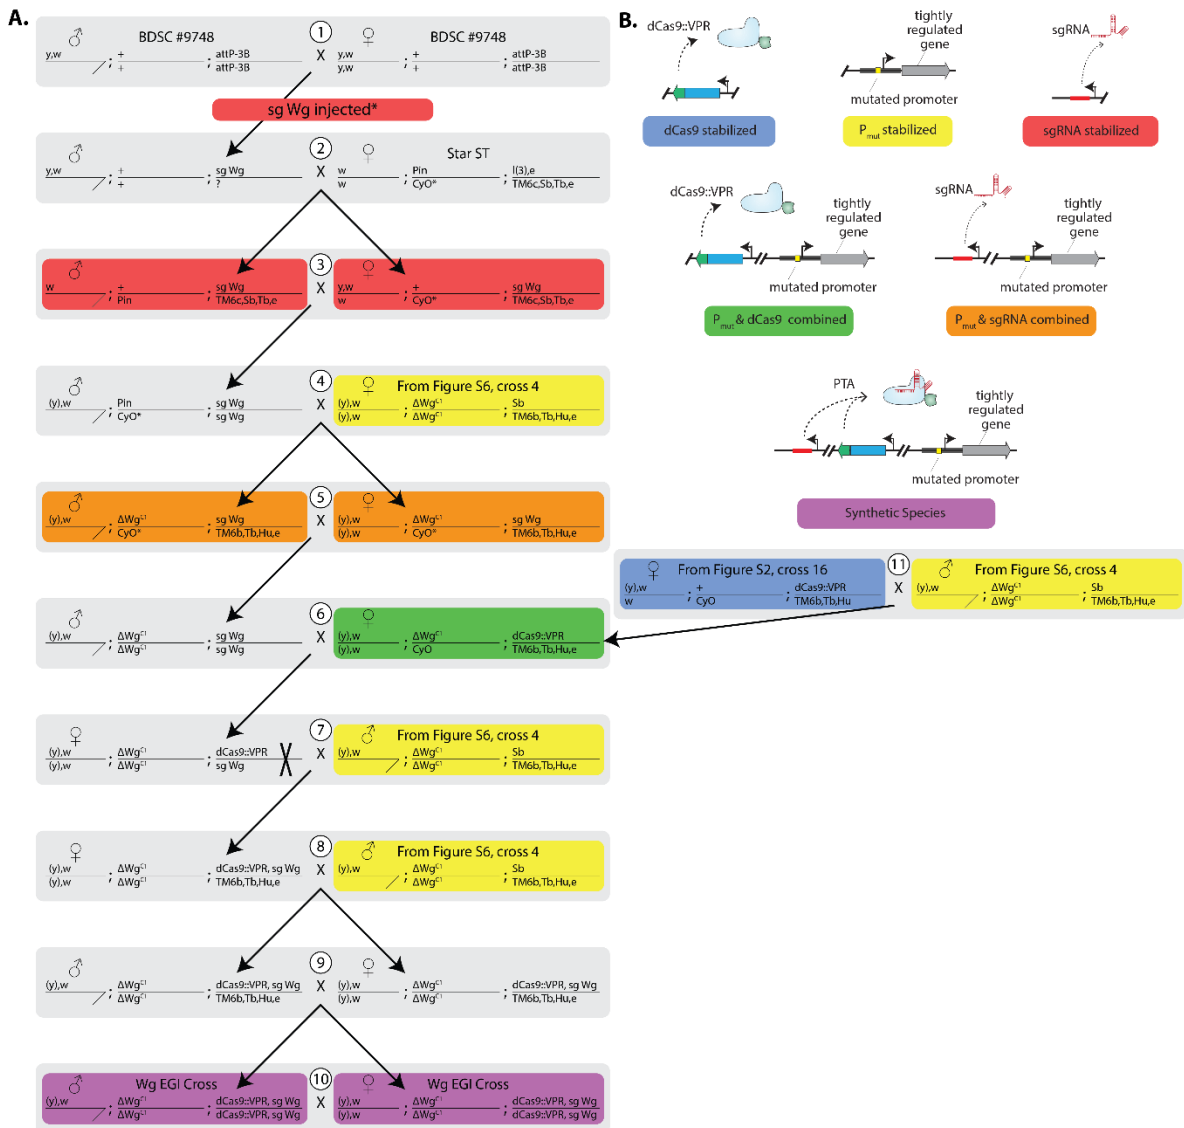

**Supplementary Figure S3. Crossing strategy to produce *wg*-EGI flies.** (A.) Genotypes and sex of flies involved in crosses required to bring together EGI components. Crosses are indexed with numbered white circles. 'X' designates a recombination event required in the female parent of cross #7. Embryos from cross #1 were injected with a sgRNA-*wg* construct and ΦC31 integrase. Question mark denotes a chromosome genotype that was not verified. The males in crosses #7, 8, and 11 and the female in cross #4 are offspring from Suppl. Fig. S6, cross #4. The female in cross #11 is offspring from Suppl. Fig. S2, cross #16. (B.) Illustrated and color-coded genotypes of key intermediates. BDSC #9748 was purchased from the Bloomington Drosophila Stock Center. Star ST is a balancer strain.

483

484

485

486 **Supplementary Figure S4: Reinjection strategy to produce *hh*-EGI flies.**

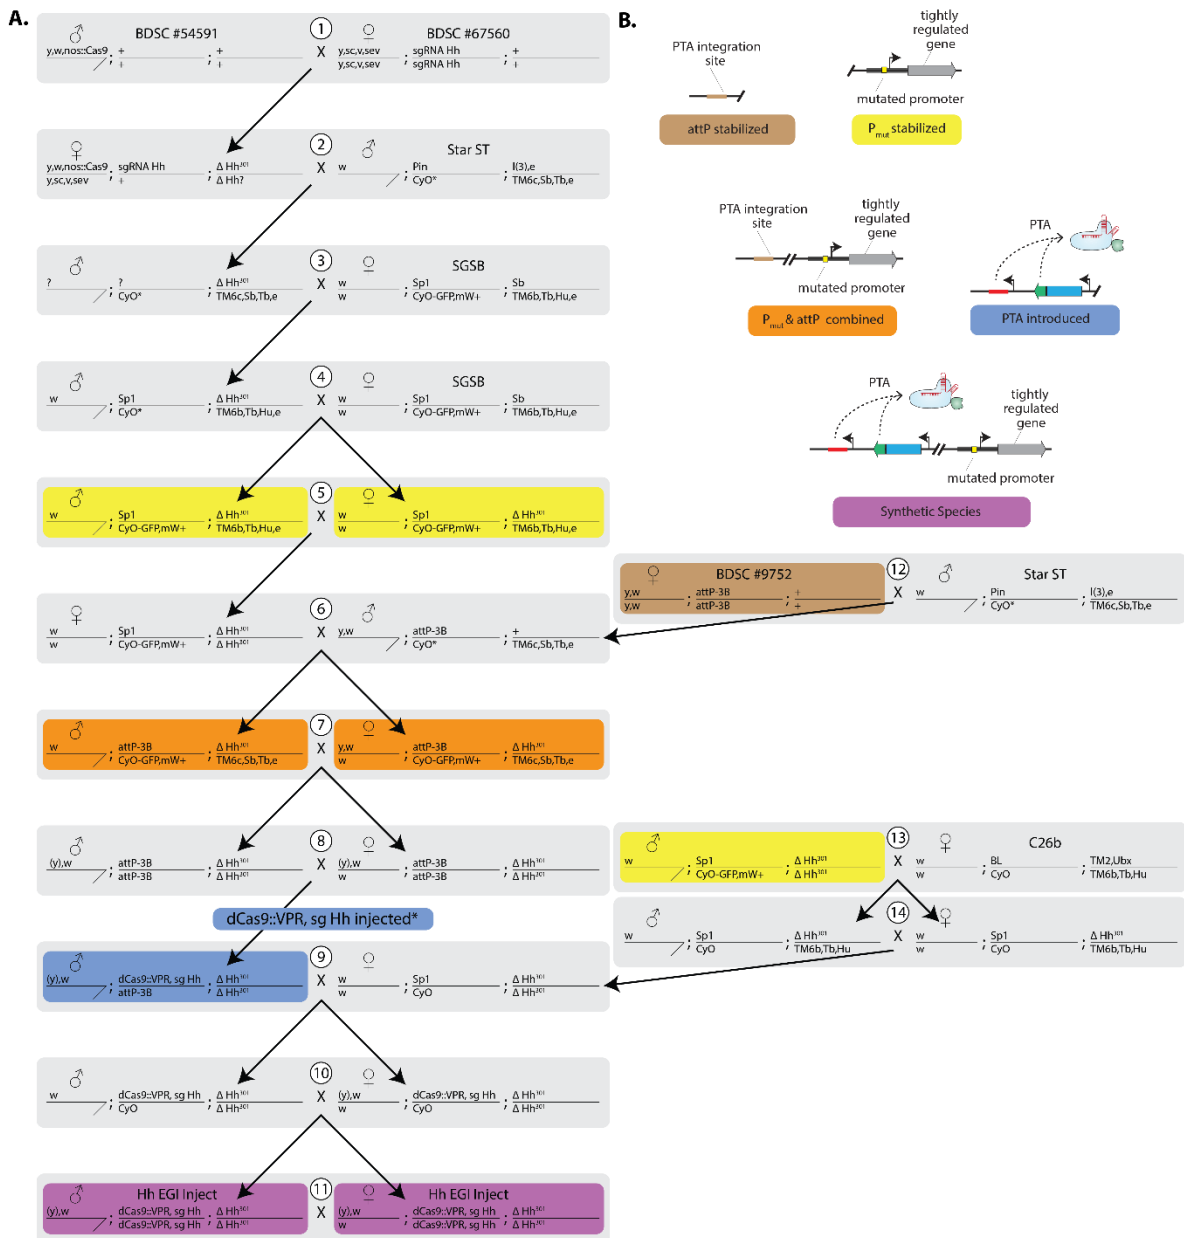

**Supplementary Figure S4. Reinjection strategy to produce *hh*-EGI flies.** (A.) Genotypes and sex of flies involved in crosses required to bring together EGI components. Crosses are indexed with numbered white circles. Embryos from cross #8 were injected with promoter::dCas9::VPR + sgRNA-hh constructs and ΦC31 integrase. Question mark denotes a chromosome genotype that was not verified. (B.) Illustrated and color-coded genotypes of key intermediates. BDSC #54591, BDSC #67560, and BDSC #9752 were purchased from the Bloomington Drosophila Stock Center. Star ST, SGSB, and C26b are balancer strains.

487

488

489 **Supplementary Figure S5: Reinjection strategy to produce *pyr*-EGI flies.**

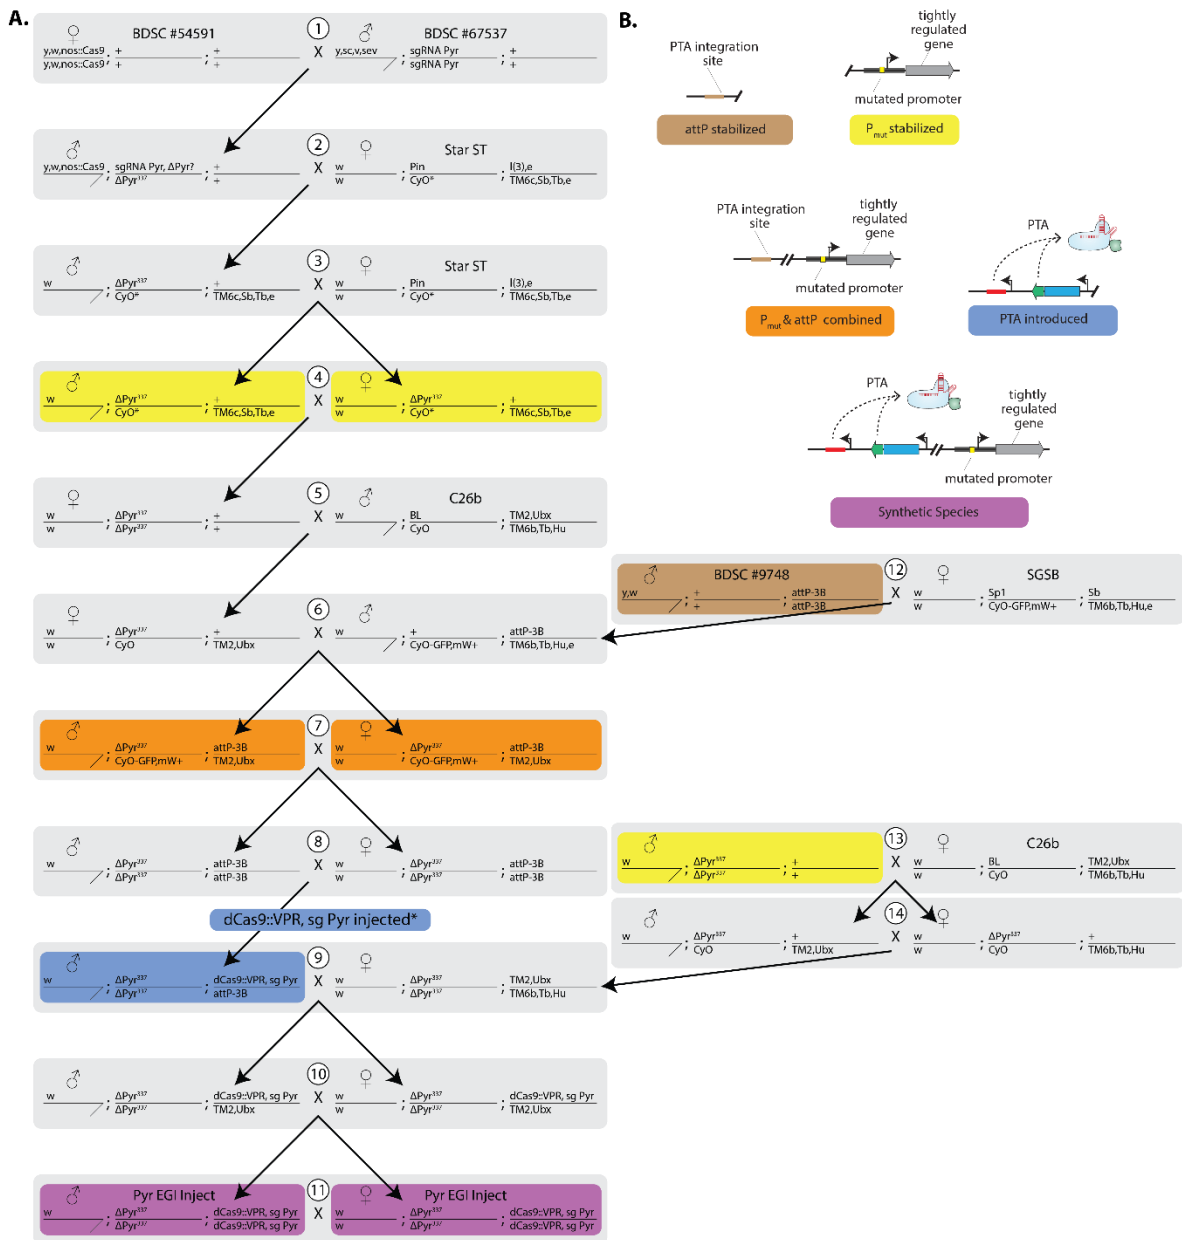

**Supplementary Figure S5. Reinjection strategy to produce *pyr*-EGI flies. (A.) Genotypes and sex of flies involved in crosses required to bring together EGI components. Crosses are indexed with numbered white circles. Embryos from cross #8 were injected with promoter::dCas9:VPR + sgRNA-pyr constructs and  $\Phi$ C31 integrase. Question mark denotes a chromosome genotype that was not verified. (B.) Illustrated and color-coded genotypes of key intermediates. BDSC #54591, BDSC #67537, and BDSC #9748 were purchased from the Bloomington Drosophila Stock Center. Star ST, SGSB, and C26b are balancer strains.**

490

491

492 **Supplementary Figure S6: Reinjection strategy to produce wg-EGI flies.**

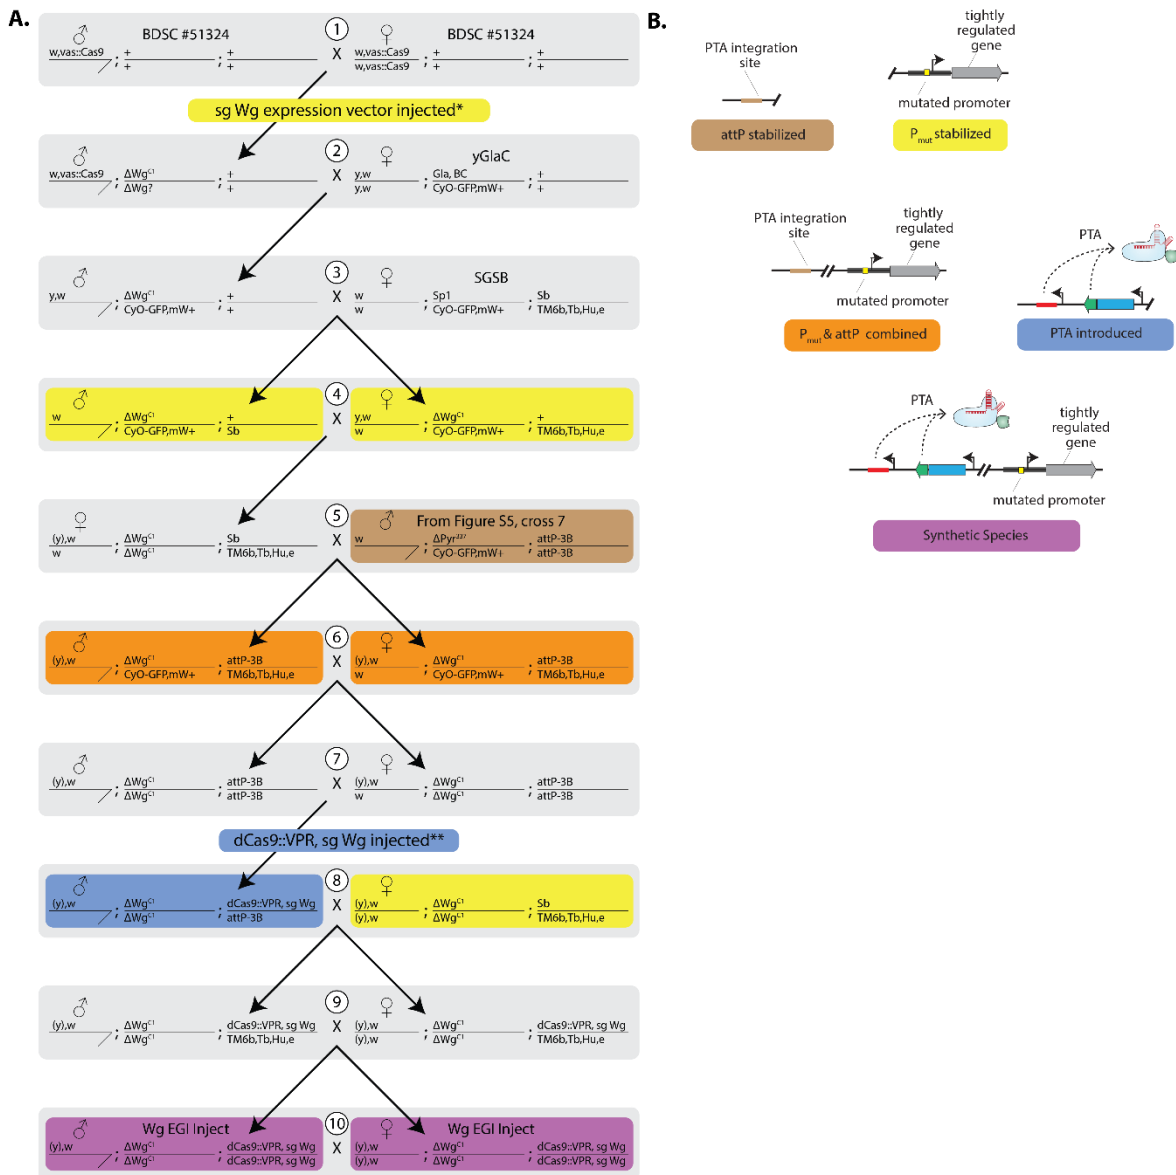

**Supplementary Figure S6. Reinjection strategy to produce wg-EGI flies.** (A.) Genotypes and sex of flies involved in crosses required to bring together EGI components. Crosses are indexed with numbered white circles. Embryos from cross #1 were injected with the sgRNA-wg expression construct. Embryos from cross #7 were injected with promoter::dCas9::VPR + sgRNA-wg constructs and ΦC31 integrase. Question mark denotes a chromosome genotype that was not verified. The male in cross #5 is offspring from Suppl. Fig. S5, cross #7. (B.) Illustrated and color-coded genotypes of key intermediates. BDSC #51324 was purchased from the Bloomington Drosophila Stock Center. yGlac and SGSB are balancer strains.

493

494

495

496 **Supplementary Figure S7: Chromosomal maps of all EGI strains reported in this work.**

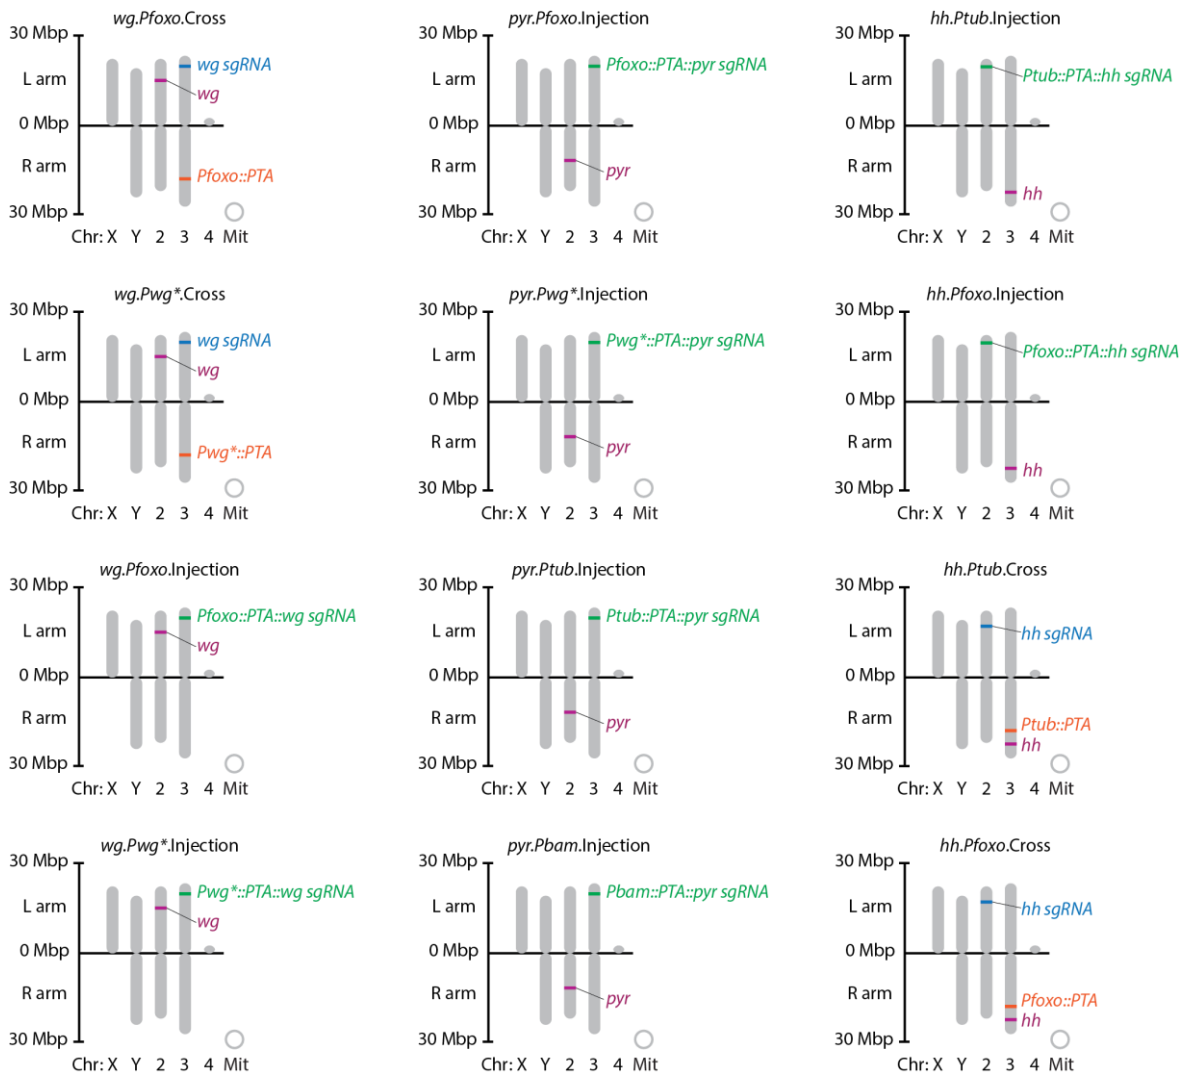

497 **Supplementary Figure S7: Chromosomal maps of all EGI strains reported in this work.**

497

498



499 **Supplementary Figure S8: Immunohistochemistry of dissected brains.**

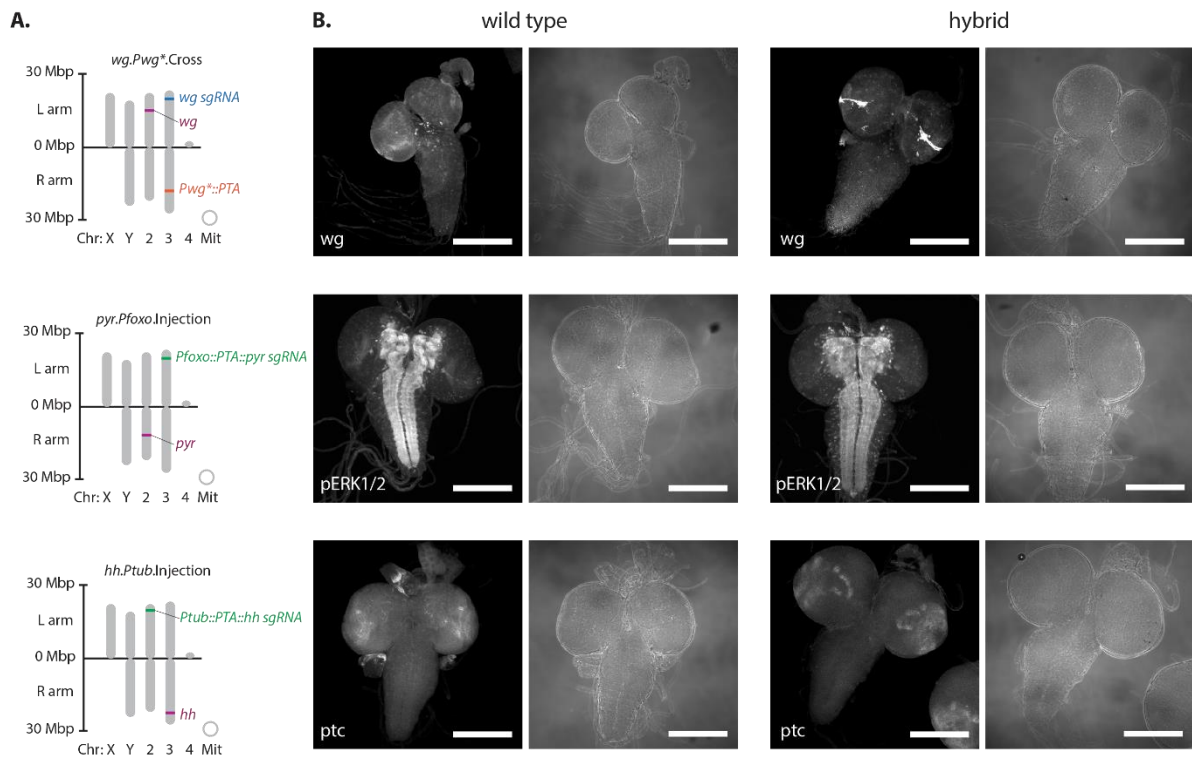

**Supplementary Fig. S8:** (A.) Chromosomal locations of genome alterations for EGI strains whose hybrid offspring were analysed by immunohistochemistry. EGI strains illustrated here correspond to the ones used in Fig. 3. (B.) Immunofluorescence staining of 3<sup>rd</sup> instar larval brains from wild-type (left) or hybrid (right) showing over- or ectopic-expression of targeted signalling pathways. Grayscale images show antibody staining for proteins encoded by lethal overexpression target (*wingless*, top) or downstream signalling pathway components (p-*ERK1/2*, middle and *patched*, bottom). Corresponding brightfield images of the brains to the right. Scale bar = 200  $\mu$ m.

500

501

502 **Supplementary Figure S9: Iterative release for negatively correlating cross resistance.**

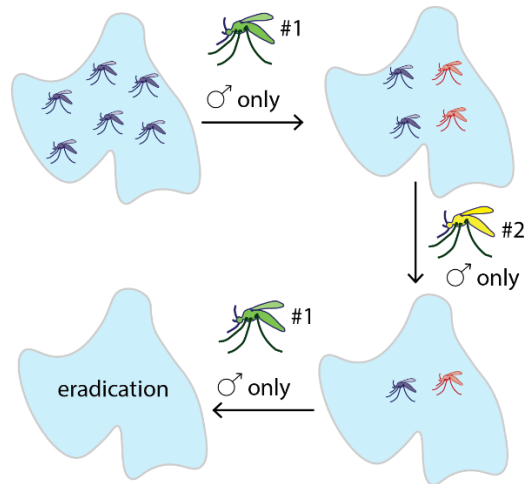

**Supplementary Figure S9. Release scheme for negatively correlating cross-resistance.** Purple denotes wild-type pests, green and yellow denote mutually-incompatible EGI strains, for which only males would be released. Orange denotes resistant 'escapees', which inherit half of their genome from the previously released biocontrol EGI strain.

503

504

505

**Supplementary Table S1: *D. melanogaster* strains used in this study**

| Strain                                          | Description                                                                                                           | Reference  | BDSC # |
|-------------------------------------------------|-----------------------------------------------------------------------------------------------------------------------|------------|--------|
| Wild Type                                       | Oregon R                                                                                                              | 37         | N/A    |
| White Eye                                       | w <sup>1118</sup>                                                                                                     | 38         | 5905   |
| 3 <sup>rd</sup> Chr. attP9                      | y <sup>1</sup> w <sup>1118</sup> ; PBac{y[+]-attP-9A}VK00027                                                          | 39         | 9744   |
| 3 <sup>rd</sup> Chr. attP3                      | y <sup>1</sup> w <sup>1118</sup> ; PBac{y[+]-attP-3B}VK00031                                                          | 39         | 9748   |
| 2 <sup>nd</sup> Chr. attP3                      | y <sup>1</sup> w <sup>1118</sup> ; PBac{y[+]-attP-3B}VK00037                                                          | 39         | 9752   |
| Vas-Cas9                                        | w[1118]; PBac{y[+mDint2]=vas-Cas9}VK00027                                                                             | 16         | 51324  |
| 2 <sup>nd</sup> Chr. attP3, ΔHH <sup>301</sup>  | w <sup>1118</sup> ; PBac{y[+]-attP-3B}VK00037; ΔHH <sup>301</sup>                                                     | this study |        |
| 3 <sup>rd</sup> Chr. attP3, Δpyr <sup>337</sup> | w <sup>1118</sup> ; Δpyr <sup>337</sup> ; PBac{y[+]-attP-3B}VK00031                                                   | this study |        |
| 3 <sup>rd</sup> Chr. attP3, ΔWg <sup>C1</sup>   | w <sup>1118</sup> ; ΔWg <sup>C1</sup> ; PBac{y[+]-attP-3B}VK00031                                                     | this study |        |
| 2 <sup>nd</sup> Chr. bal, ΔHH <sup>301</sup>    | w <sup>1118</sup> ; Sp1/ CyO; ΔHH <sup>301</sup>                                                                      | this study |        |
| 3 <sup>rd</sup> Chr. bal, Δpyr <sup>337</sup>   | w <sup>1118</sup> ; Δpyr <sup>337</sup> ; TM2/ TM6b, Tb, Hu                                                           | this study |        |
| 3 <sup>rd</sup> Chr. bal, ΔWg <sup>C1</sup>     | w <sup>1118</sup> ; ΔWg <sup>C1</sup> ; Sb/ TM6b, Tb, Hu                                                              | this study |        |
| hh.FoxO.cross                                   | w <sup>1118</sup> ; P{y[+t7.7] v[+t1.8]=TOE.GS00191}attP40; P{pFoxo::dCas9-VPR}attP-9A, ΔHH <sup>301</sup>            | this study |        |
| hh.FoxO.injection                               | y <sup>1</sup> w <sup>1118</sup> ; P{pFoxo::dCas9-VPR::sgRNA <sup>HH</sup> }attP-3B; ΔHH <sup>301</sup>               | this study |        |
| hh.Tub.cross                                    | w <sup>1118</sup> ; P{y[+t7.7] v[+t1.8]=TOE.GS00191}attP40; P{pTub::dCas9-VPR }attP-9A, ΔHH <sup>301</sup>            | this study |        |
| hh.Tub.injection                                | y <sup>1</sup> w <sup>1118</sup> ; P{pTub::dCas9-VPR::sgRNA <sup>HH</sup> }attP-3B; ΔHH <sup>301</sup>                | this study |        |
| pyr.Bam.injection                               | w <sup>1118</sup> ; Δpyr <sup>337</sup> ; P{pBam::dCas9-VPR::sgRNA <sup>Pyr</sup> }attP-3B                            | this study |        |
| pyr.FoxO.injection                              | w <sup>1118</sup> ; Δpyr <sup>337</sup> ; P{pFoxo::dCas9-VPR::sgRNA <sup>Pyr</sup> }attP-3B                           | this study |        |
| pyr.Tub.injection                               | w <sup>1118</sup> ; Δpyr <sup>337</sup> ; P{pTub::dCas9-VPR::sgRNA <sup>Pyr</sup> }attP-3B                            | this study |        |
| pyr.Wg.injection                                | w <sup>1118</sup> ; Δpyr <sup>337</sup> ; P{pΔWg <sup>C1</sup> ::dCas9-VPR::sgRNA <sup>Pyr</sup> }attP-3B             | this study |        |
| wg.FoxO.cross                                   | w <sup>1118</sup> ; P{sgRNA <sup>Wg</sup> }attP-3B, ΔWg <sup>C1</sup> ; P{pFoxo::dCas9-VPR}attP-9A                    | this study |        |
| wg.FoxO.injection                               | y <sup>1</sup> w <sup>1118</sup> ; ΔWg <sup>C1</sup> ; P{pFoxo::dCas9-VPR::sgRNA <sup>Wg</sup> }attP-3B               | this study |        |
| wg.Wg.cross                                     | w <sup>1118</sup> ; PBac{sgRNA <sup>Wg</sup> }attP-3B, ΔWg <sup>C1</sup> ; P{pΔWg <sup>C1</sup> ::dCas9-VPR}attP-9A   | this study |        |
| wg.Wg.injection                                 | y <sup>1</sup> w <sup>1118</sup> ; ΔWg <sup>C1</sup> ; P{pΔWg <sup>C1</sup> ::dCas9-VPR::sgRNA <sup>Wg</sup> }attP-3B | this study |        |
| nos-Cas9                                        | y <sup>1</sup> M{w[+mC]=nos-Cas9.P}ZH-2A, w <sup>*</sup>                                                              | 40         | 54591  |
| hh sgRNA                                        | y <sup>1</sup> sc <sup>*</sup> v <sup>1</sup> ; P{y[+t7.7] v[+t1.8]=TOE.GS00191}attP40                                | 13         | 67560  |
| hid sgRNA                                       | y <sup>1</sup> w <sup>1118</sup> ; PBac{sgRNA <sup>Hid</sup> }attP-3B                                                 | this study |        |
| pyr sgRNA                                       | y <sup>1</sup> sc <sup>*</sup> v <sup>1</sup> ; P{y[+t7.7] v[+t1.8]=TOE.GS00085}attP40                                | 13         | 67537  |
| upd1 sgRNA                                      | y <sup>1</sup> sc <sup>*</sup> v <sup>1</sup> ; P{y[+t7.7] v[+t1.8]=TOE.GS00169}attP40                                | 13         | 67555  |
| upd2 sgRNA                                      | y <sup>1</sup> sc <sup>*</sup> v <sup>1</sup> ; P{y[+t7.7] v[+t1.8]=TOE.GS00171}attP40                                | 13         | 67556  |
| upd3 sgRNA                                      | y <sup>1</sup> sc <sup>*</sup> v <sup>1</sup> ; P{y[+t7.7] v[+t1.8]=TOE.GS00129}attP40                                | 13         | 67546  |
| vn sgRNA                                        | y <sup>1</sup> sc <sup>*</sup> v <sup>1</sup> ; P{y[+t7.7] v[+t1.8]=TOE.GS00144}attP40                                | 13         | 67548  |
| wg sgRNA                                        | y <sup>1</sup> w <sup>1118</sup> ; PBac{sgRNA <sup>Wg</sup> }attP-3B                                                  | this study |        |
| pTub::dCas9-VPR                                 | y <sup>1</sup> w <sup>1118</sup> ; P{pTub::dCas9-VPR}attP-9A                                                          | this study |        |
| pFoxo::dCas9-VPR                                | y <sup>1</sup> w <sup>1118</sup> ; P{pFoxo::dCas9-VPR}attP-9A                                                         | this study |        |
| pTub::dxCas9-VPR                                | y <sup>1</sup> w <sup>1118</sup> ; P{pTub::dxCas9-VPR}attP-9A                                                         | this study |        |
| pΔWg::dCas9-VPR                                 | y <sup>1</sup> w <sup>1118</sup> ; P{pΔWg <sup>C1</sup> ::dCas9-VPR}attP-9A                                           | this study |        |
| ΔWg                                             | w <sup>1118</sup> ; ΔWg <sup>C1</sup>                                                                                 | this study |        |
| ΔHH                                             | w <sup>1118</sup> ; ΔHH <sup>301</sup>                                                                                | this study |        |
| ΔPyr                                            | w <sup>1118</sup> ; ΔPyr <sup>337</sup>                                                                               | this study |        |

506

507

508

**Supplementary Table S2: Plasmids used in this study**

| Plasmid             | Integrated in Fly Strain                      | Description                                                                                    | Reference  |
|---------------------|-----------------------------------------------|------------------------------------------------------------------------------------------------|------------|
| pMM7-1-1            | N/A                                           | pU6-BbsI-chiRNA targeting upstream wg promoter protospacer                                     | this study |
| pMM7-1-2            | N/A                                           | pU6-BbsI-chiRNA targeting downstream wg promoter protospacer                                   | this study |
| pMM7-5-3            | wg sgRNA                                      | Expresses dual sgRNAs targeting Wg promoter                                                    | this study |
| pMM7-6-2            | wg.FoxO.cross<br>hh.FoxO.cross                | Foxo promoter driving dCas9-VPR expression                                                     | this study |
| pMM7-6-3            | wg.Wg.cross                                   |                                                                                                |            |
| pMM7-6-3            | pTub::dCas9-VPR<br>hh.Tub.cross               | Short tubulin alpha promoter driving dCas9-VPR expression                                      | this study |
| pMM7-6-4            | pΔWg <sup>C1</sup> ::dCas9-VPR<br>wg.Wg.cross | Mutated Wg promoter driving dCas9-VPR expression                                               | this study |
| pMM7-9-4            | pTub::dxCas9-VPR                              | Short tubulin alpha promoter driving dxCas9-VPR expression                                     | this study |
| pMM7-6-2-HH         | hh.FoxO.injection                             | Foxo promoter driving dCas9-VPR expression. Dual sgRNAs targeting HH promoter.                 | this study |
| pMM7-6-2-Pyr        | pyr.FoxO.injection                            | Foxo promoter driving dCas9-VPR expression. Dual sgRNAs targeting Pyr promoter.                | this study |
| pMM7-6-2-Wg         | wg.FoxO.injection                             | Foxo promoter driving dCas9-VPR expression. Dual sgRNAs targeting Wg promoter.                 | this study |
| pMM7-6-3-HH         | hh.Tub.injection                              | Short tubulin alpha promoter driving dCas9-VPR expression. Dual sgRNAs targeting HH promoter.  | this study |
| pMM7-6-3-Pyr        | pyr.Tub.injection                             | Short tubulin alpha promoter driving dCas9-VPR expression. Dual sgRNAs targeting Pyr promoter. | this study |
| pMM7-6-4-Pyr        | pyr.Wg.injection                              | Mutated Wg promoter driving dCas9-VPR expression. Dual sgRNAs targeting Pyr promoter.          | this study |
| pMM7-6-4-Wg         | wg.Wg.injection                               | Mutated Wg promoter driving dCas9-VPR expression. Dual sgRNAs targeting Wg promoter.           | this study |
| pMM7-6-5-Pyr        | pyr.Bam.injection                             | Bam promoter driving dCas9-VPR expression. Dual sgRNAs targeting Pyr promoter.                 | this study |
| pU6-BbsI-chiRNA     | N/A                                           | sgRNA expression plasmid                                                                       | 16         |
| pAct:dCas9-VPR      | N/A                                           | Source of dCas9-VPR                                                                            | 35         |
| pCFD4               | N/A                                           | sgRNA expression plasmid                                                                       | 40         |
| p{CFD4-3xP3::DsRed} | N/A                                           | sgRNA expression plasmid                                                                       | 41         |

509

510

511

512

**Supplementary Table S3: Promoter Target Sequences**

| Target Promoter | Target 1                  | Target 2                 | Reference |
|-----------------|---------------------------|--------------------------|-----------|
| <i>hh</i>       | TATGCCACTCGACGTTTCGAT CGG | TTCCAATTCCCTTGCGCATA AGG | 13        |
| <i>hid</i>      | CACATGCACGTGCATGA AGG     | CATGCACGTGCATGAAGG AGG   | 14        |
| <i>pyr</i>      | CGGCGGGGGCGGTTTCGAAGC GGG | CGCCGCCGACAATCCGAATG CGG | 13        |
| <i>upd1</i>     | GCGAGCTGAGCGGCCTCTGC CGG  | TGCCGACGAGCGGTACGCCA TGG | 13        |
| <i>upd2</i>     | CAGCAAGCGATTGTGATAGT TGG  | TGCTGATGCTGATCGCTCCA CGG | 13        |
| <i>upd3</i>     | TGGAGTGGAGTGTGTGGAG TGG   | GGAGTTCAGTCAGTCTCCGC CGG | 13        |
| <i>vn</i>       | AGCATTACAACGTATCTCA CGG   | GTGCCGAAGATATTCGAACA CGG | 13        |
| <i>wg</i>       | ATGAGGTTGCGCAAATAATC GGG  | GGAAATGGAAAACTCTGCC CGG  | 42        |

513

**Supplementary Table S4: Promoter Sequencing Primers**

| Primer Name | Sequence (5'→3')         |
|-------------|--------------------------|
| HH_F        | CCAGGAGTCACACAATACAC     |
| HH_R        | GCGAATACGAATGCGAGTAT     |
| Pyr_F       | GAACGAACTGGCCCACTTGG     |
| Pyr_R       | CTGTAGCCGCGCAATGCACT     |
| Wg_F        | CGGAATGCCAAAGTGTGT       |
| Wg_R        | GCTAGTTATAGATCGGTTTCGATC |

514

515

516 **Supplementary Data File** (Attached as FlyEGI\_SDF.xlsx)

517 The Supplementary Data File is an excel (.xlsx) file containing all of the numerical results from fly  
518 mating experiments described in this manuscript. There are three sheets, corresponding to data  
519 graphically reported in Figures 2-4. Below is a description of the types of data contained in each  
520 sheet (**bold**) and column (*italics*).

521 **Sheet 1: PTA-sgRNA testing (figure 2).**

522 *Column A. dCas9 Activator:* Description of the protein-only component of the PTA (i.e. dCas9 with no  
523 sgRNA) that is homozygous in the male adult involved in the cross

524 *Column B. gRNA target gene:* Description of the sgRNA construct that is homozygous in the female  
525 adult involved in the cross.

526 *Columns C, H. Pupae:* Counts of the total number of pupae from each cross, as determined by  
527 counting pupal casings. Data are reported separately for two biological replicates.

528 *Columns D, I. Males:* Counts of the total number of adult males present 15 days after crosses were  
529 set up. Data are reported separately for two biological replicates.

530 *Columns E, J. Females:* Counts of the total number of adult females present 15 days after crosses  
531 were set up. Data are reported separately for two biological replicates.

532 *Columns F, K. Stuck:* Counts of the adults that became stuck in the fly medium for which sex was not  
533 determined, 15 days after crosses were set up. Data are reported separately for two  
534 biological replicates.

535 *Columns G, L. Total Adults:* Sum of Males, Females and Stuck adults from previous columns. Data are  
536 reported separately for two biological replicates.

537 *Column M. Observed Lethality:* Assigned phenotype based on hybrid survival data.

538

539 **Sheet 2: EGI x WT testing (figure 3).**

540 *Column A. Paternal genotype:* Strain name of the male adult involved in the cross.

541 *Column B. Maternal genotype:* Strain name of the female adult involved in the cross.

542 *Columns C, F, I. Pupae:* Counts of the total number of pupae from each cross, as determined by  
543 counting pupal casings. Data are reported separately for three biological replicates.

544 *Columns D, G, J. Males:* Counts of the total number of adult males present 15 days after crosses were  
545 set up. Data are reported separately for three biological replicates.

546 *Columns E, H, K. Females:* Counts of the total number of adult females present 15 days after crosses  
547 were set up. Data are reported separately for three biological replicates.

548

549 **Sheet 3: EGI testing (figure 4)**

550 *Column A. Paternal genotype:* Strain name of the male adult involved in the cross.

551 *Column B. Maternal genotype:* Strain name of the female adult involved in the cross.

552 *Columns C, F, I. Pupae:* Counts of the total number of pupae from each cross, as determined by  
553 counting pupal casings. Data are reported separately for three biological replicates.

554 *Columns D, G, J. Males:* Counts of the total number of adult males present 15 days after crosses were  
555 set up. Data are reported separately for three biological replicates.

556 *Columns E, H, K. Females:* Counts of the total number of adult females present 15 days after crosses  
557 were set up. Data are reported separately for three biological replicates.

558

559

560

561 **Supplementary Video File** (Attached as FlyEGI\_SVF.pptx)

562 PowerPoint file containing an embedded time-lapse video of representative mating from **Fig. 3**. EGI  
563 flies are *pyr.Pfoxo*. Injection genotype. Images were taken on a Canon EOS Rebel T5 Digital SLR  
564 equipped with a Satechi remote shutter. Image files were compiled into movie (with shake correction)  
565 using Adobe Premier Pro 2019. For the purpose of the video, lights were left on for all 24 hours, 15  
566 days of the experiment. During experiments reported in the paper, normal light-dark cycles were used,  
567 as described above.

568

569

570 **Supplementary References**

- 571 (1) Davis, S.; Bax, N.; Grewe, P. (2001) Engineered Underdominance Allows Efficient and  
572 Economical Introgression of Traits into Pest Populations. *J. Theor. Biol.* 212 (1), 83–98.  
573 <https://doi.org/10.1006/jtbi.2001.2357>.
- 574 (2) Leftwich, P. T.; Edgington, M. P.; Harvey-Samuel, T.; Carabajal Paladino, L. Z.; Norman, V. C.;  
575 Alphey, L. Recent Advances in Threshold-Dependent Gene Drives for Mosquitoes.  
576 *Biochemical Society Transactions*. 2018. <https://doi.org/10.1042/BST20180076>.
- 577 (3) Sinkins, S. P.; Gould, F. (2006) Gene Drive Systems for Insect Disease Vectors. *Nat. Rev. Genet.*  
578 7 (6), 427–435. <https://doi.org/10.1038/nrg1870>.
- 579 (4) Akbari, O. S.; Matzen, K. D.; Marshall, J. M.; Huang, H.; Ward, C. M.; Hay, B. A. (2013) A  
580 Synthetic Gene Drive System for Local, Reversible Modification and Suppression of Insect  
581 Populations. *Curr. Biol.* 23 (8), 671–677. <https://doi.org/10.1016/j.cub.2013.02.059>.
- 582 (5) Buchman, A. B.; Ivy, T.; Marshall, J. M.; Akbari, O. S.; Hay, B. A. (2018) Engineered Reciprocal  
583 Chromosome Translocations Drive High Threshold, Reversible Population Replacement in  
584 *Drosophila*. *ACS Synth. Biol.* 7 (5), 1359–1370. <https://doi.org/10.1021/acssynbio.7b00451>.
- 585 (6) Guy Reeves, R.; Bryk, J.; Altrock, P. M.; Denton, J. A.; Reed, F. A. (2014) First Steps towards  
586 Underdominant Genetic Transformation of Insect Populations. *PLoS One*.  
587 <https://doi.org/10.1371/journal.pone.0097557>.
- 588 (7) Dobzhansky, T. (1936) Studies on Hybrid Sterility II: Localization of Sterility Factors in  
589 *Drosophila Pseudoobscura* Hybrids. *Genetics* 21, 113–135.
- 590 (8) Muller, H. J. Isolating Mechanisms, Evolution and Temperature. *Biol. Symp.* 1942, p 71–125  
591 ST–Isolating mechanisms, evolution and t.
- 592 (9) Orr, H. A.; Turelli, M. (2001) The Evolution of Postzygotic Isolation: Accumulating Dobzhansky-  
593 Muller Incompatibilities. *Evolution (N. Y.)* 55 (6), 1085–1094.
- 594 (10) Maselko, M.; Heinsch, S. C.; Chacón, J. M.; Harcombe, W. R.; Smanski, M. J. (2017)  
595 Engineering Species-like Barriers to Sexual Reproduction. *Nat. Commun.* 8 (1).  
596 <https://doi.org/10.1038/s41467-017-01007-3>.
- 597 (11) Chavez, A.; Scheiman, J.; Vora, S.; Pruitt, B. W.; Tuttle, M.; P R Iyer, E.; Lin, S.; Kiani, S.;  
598 Guzman, C. D.; Wiegand, D. J.; et al. (2015) Highly Efficient Cas9-Mediated Transcriptional  
599 Programming. *Nat. Methods*. <https://doi.org/10.1038/nmeth.3312>.
- 600 (12) Lin, S.; Ewen-Campen, B.; Ni, X.; Housden, B. E.; Perrimon, N. (2015) In Vivo Transcriptional  
601 Activation Using CRISPR/Cas9 in *Drosophila*. *Genetics* 201 (2), 433–442.  
602 <https://doi.org/10.1534/genetics.115.181065>.
- 603 (13) Ewen-Campen, B.; Yang-Zhou, D.; Fernandes, V. R.; González, D. P.; Liu, L.-P.; Tao, R.; Ren, X.;  
604 Sun, J.; Hu, Y.; Zirin, J.; et al. (2017) Optimized Strategy for in Vivo Cas9-Activation in  
605 *Drosophila*. *Proc. Natl. Acad. Sci.* 201707635. <https://doi.org/10.1073/pnas.1707635114>.
- 606 (14) Waters, A. J.; Capriotti, P.; Gaboriau, D.; Papathanos, P. A.; Windbichler, N.; Alexander, S.;  
607 Building, F.; Kensington, S. (2018) Rationally-Engineered Reproductive Barriers Using CRISPR  
608 & CRISPRa: An Evaluation of the Synthetic Species Concept in *Drosophila Melanogaster*. *Sci.*  
609 *Transl. Med.* <https://doi.org/10.1101/259010>.
- 610 (15) Hu, J. H.; Miller, S. M.; Geurts, M. H.; Tang, W.; Chen, L.; Sun, N.; Zeina, C. M.; Gao, X.; Rees,  
611 H. A.; Lin, Z.; et al. (2018) Evolved Cas9 Variants with Broad PAM Compatibility and High DNA



- 612 Specificity. *Nature*. <https://doi.org/10.1038/nature26155>.
- 613 (16) Gratz, S. J.; Cummings, A. M.; Nguyen, J. N.; Hamm, D. C.; Donohue, L. K.; Harrison, M. M.;  
614 Wildonger, J.; O'connor-Giles, K. M. Genome Engineering of *Drosophila* with the CRISPR RNA-  
615 Guided Cas9 Nuclease. *Genetics*. August 2013, pp 1029–1035.  
616 <https://doi.org/10.1534/genetics.113.152710>.
- 617 (17) Ewen-Campen, B.; Yang-Zhou, D.; Fernandes, V. R.; González, D. P.; Liu, L. P.; Tao, R.; Ren, X.;  
618 Sun, J.; Hu, Y.; Zirin, J.; et al. (2017) Optimized Strategy for in Vivo Cas9-Activation in  
619 *Drosophila*. *Proc. Natl. Acad. Sci. U. S. A.* <https://doi.org/10.1073/pnas.1707635114>.
- 620 (18) Champer, J.; Liu, J.; Oh, S. Y.; Reeves, R.; Luthra, A.; Oakes, N.; Clark, A. G.; Messer, P. W.  
621 (2018) Reducing Resistance Allele Formation in CRISPR Gene Drive. *Proc. Natl. Acad. Sci. U. S.*  
622 *A.* <https://doi.org/10.1073/pnas.1720354115>.
- 623 (19) Krstic, D.; Boll, W.; Noll, M. (2013) Influence of the White Locus on the Courtship Behavior of  
624 *Drosophila* Males. *PLoS One*. <https://doi.org/10.1371/journal.pone.0077904>.
- 625 (20) Forbes, A. J.; Lin, H.; Ingham, P. W.; Spradling, A. C. (1996) Hedgehog Is Required for the  
626 Proliferation and Specification of Ovarian Somatic Cells Prior to Egg Chamber Formation in  
627 *Drosophila*. *Development*.
- 628 (21) Vied, C.; Horabin, J. I. (2001) The Sex Determination Master Switch, Sex-Lethal, Responds to  
629 Hedgehog Signaling in the *Drosophila* Germline. *Development*.
- 630 (22) Alexandre, C.; Jacinto, A.; Ingham, P. W. (1996) Transcriptional Activation of Hedgehog Target  
631 Genes in *Drosophila* Is Mediated Directly by the Cubitus Interruptus Protein, a Member of the  
632 GLI Family of Zinc Finger DNA-Binding Proteins. *Genes Dev.*  
633 <https://doi.org/10.1101/gad.10.16.2003>.
- 634 (23) Moreno, E. (2012) Design and Construction of “Synthetic Species.” *PLoS One* 7 (7), e39054.  
635 <https://doi.org/10.1371/journal.pone.0039054>.
- 636 (24) Clark, M.; Maselko, M. (2020) Transgene Biocontainment Strategies for Molecular Farming.  
637 *Front. Plant Sci.* 11 (March), 1–11. <https://doi.org/10.3389/fpls.2020.00210>.
- 638 (25) Magori, K.; Gould, F. (2006) Genetically Engineered Underdominance for Manipulation of  
639 Pest Populations: A Deterministic Model. *2620* (April), 2613–2620.  
640 <https://doi.org/10.1534/genetics.105.051789>.
- 641 (26) Champer, J.; Buchman, A.; Akbari, O. S. Cheating Evolution: Engineering Gene Drives to  
642 Manipulate the Fate of Wild Populations. *Nature Reviews Genetics*. 2016, pp 146–159.  
643 <https://doi.org/10.1038/nrg.2015.34>.
- 644 (27) Dyck, V. A.; Hendrichs, J.; Robinson, A. S. *Sterile Insect Technique: Principles and Practice in*  
645 *Area-Wide Integrated Pest Management*. <https://doi.org/10.5860/CHOICE.43-5894>.
- 646 (28) Alphey, N.; Bonsall, M. B. (2014) Interplay of Population Genetics and Dynamics in the  
647 Genetic Control of Mosquitoes. *J. R. Soc. Interface*. <https://doi.org/10.1098/rsif.2013.1071>.
- 648 (29) Legros, M.; Lloyd, A. L.; Huang, Y.; Gould, F. (2009) Density-Dependent Intraspecific  
649 Competition in the Larval Stage of *Aedes Aegypti* (Diptera: Culicidae): Revisiting the Current  
650 Paradigm. *J. Med. Entomol.* 46 (3), 409–419. <https://doi.org/10.1603/033.046.0301>.
- 651 (30) Walsh, R. K.; Facchinelli, L.; Ramsey, J. M.; Bond, J. G.; Gould, F. (2011) Assessing the Impact  
652 of Density Dependence in Field Populations of *Aedes Aegypti*. *J. Vector Ecol.*  
653 <https://doi.org/10.1111/j.1948-7134.2011.00170.x>.

- 654 (31) Asplen, M. K.; Anfora, G.; Biondi, A.; Choi, D. S.; Chu, D.; Daane, K. M.; Gibert, P.; Gutierrez, A.  
655 P.; Hoelmer, K. A.; Hutchison, W. D.; et al. (2015) Invasion Biology of Spotted Wing Drosophila  
656 (*Drosophila Suzukii*): A Global Perspective and Future Priorities. *J. Pest Sci. (2004)*. *88* (3),  
657 469–494. <https://doi.org/10.1007/s10340-015-0681-z>.
- 658 (32) Maselko, M.; Heinsch, S.; Das, S.; Smanski, M. J. (2018) Genetic Incompatibility Combined  
659 with Female-Lethality Is Effective and Robust in Simulations of *Aedes Aegypti* Population  
660 Control. *Bioarxiv* <http://dx.doi.org/10.1101/316406>.
- 661 (33) Chapman, R. B.; Penman, D. R. Negatively Correlated Cross-Resistance to a Synthetic  
662 Pyrethroid in Organo-Phosphorus-Resistant *Tetranychus Urticae* [11]. *Nature*. 1979.  
663 <https://doi.org/10.1038/281298a0>.
- 664 (34) Gibson, D. G.; Young, L.; Chuang, R.-Y.; Venter, J. C.; Hutchison, C. A.; Smith, H. O. (2009)  
665 Enzymatic Assembly of DNA Molecules up to Several Hundred Kilobases. *Nat. Methods* *6*,  
666 343–345. <https://doi.org/10.1038/nmeth.1318>.
- 667 (35) Chavez, A.; Tuttle, M.; Pruitt, B. W.; Ewen-campen, B.; Chari, R.; Ter-ovanesyan, D.; Haque, S.  
668 J.; Cecchi, R. J.; Kowal, E. J. K.; Buchthal, J.; et al. (2016) Comparison of Cas9 Activators in  
669 Multiple Species. *Nat. Methods* No. May, 1–7. <https://doi.org/10.1038/nmeth.3871>.
- 670 (36) Richardson, C. D.; Ray, G. J.; DeWitt, M. A.; Curie, G. L.; Corn, J. E. (2016) Enhancing  
671 Homology-Directed Genome Editing by Catalytically Active and Inactive CRISPR-Cas9 Using  
672 Asymmetric Donor DNA. *Nat. Biotechnol.* <https://doi.org/10.1038/nbt.3481>.
- 673 (37) Lindsley, D. L.; Grell, E. H.; Bridges, C. B. (Calvin B. *Genetic Variations of Drosophila*  
674 *Melanogaster*.
- 675 (38) Ryder, E.; Hartl, D. L.; Wu, C. -tin. (2004) The DrosDel Collection: A Set of P-Element Insertions  
676 for Generating Custom Chromosomal Aberrations in *Drosophila Melanogaster*. *Genetics* *167*  
677 (2), 797–813. <https://doi.org/10.1534/genetics.104.026658>.
- 678 (39) Venken, K. J. T.; He, Y.; Hoskins, R. A.; Bellen, H. J. (2006) P[Acman]: A BAC Transgenic  
679 Platform for Targeted Insertion of Large DNA Fragments in *D. Melanogaster*. *Science* *314*  
680 (5806), 1747–1751. <https://doi.org/10.1126/science.1134426>.
- 681 (40) Port, F.; Chen, H. M.; Lee, T.; Bullock, S. L. (2014) Optimized CRISPR/Cas Tools for Efficient  
682 Germline and Somatic Genome Engineering in *Drosophila*. *Proc. Natl. Acad. Sci. U. S. A.* *111*  
683 (29), E2967-76. <https://doi.org/10.1073/pnas.1405500111>.
- 684 (41) Addgene: p{CFD4-3xP3::DsRed}.
- 685 (42) Lin, S.; Ewen-Campen, B.; Ni, X.; Housden, B. E.; Perrimon, N. (2015) In Vivo Transcriptional  
686 Activation Using CRISPR/Cas9 in *Drosophila*. *Genetics* *201* (2), 433–442.  
687 <https://doi.org/10.1534/genetics.115.181065>.
- 688
